RESEARCH ARTICLE

# Nucleases as a barrier to gene silencing in the cotton boll weevil, *Anthonomus grandis*

Rayssa Almeida Garcia<sup>1,2</sup>, Leonardo Lima Pepino Macedo<sup>2</sup>, Danila Cabral do Nascimento<sup>3</sup>, François-Xavier Gillet<sup>2</sup>, Clidia Eduarda Moreira-Pinto<sup>1,2</sup>, Muhammad Faheem<sup>2</sup>, Angelina Maria Moreschi Basso<sup>2</sup>, Maria Cristina Mattar Silva<sup>2</sup>, Maria Fatima Grossi-de-Sa<sup>2,3\*</sup>

**1** Brasilia Federal University (UnB), Brasília - CEP, Brasília, Federal District, Brazil, **2** Embrapa Genetic Resources and Biotechnology, Brasília, Federal District, Brazil, **3** Catholic University of Brasília, CEP, Brasília, Federal District, Brazil

\* [fatima.grossi@embrapa.br](mailto:fatima.grossi@embrapa.br)

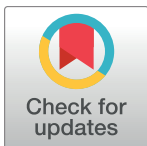

## Abstract

RNA interference (RNAi) approaches have been applied as a biotechnological tool for controlling plant insect pests via selective gene down regulation. However, the inefficiency of RNAi mechanism in insects is associated with several barriers, including dsRNA delivery and uptake by the cell, dsRNA interaction with the cellular membrane receptor and dsRNA exposure to insect gut nucleases during feeding. The cotton boll weevil (*Anthonomus grandis*) is a coleopteran in which RNAi-mediated gene silencing does not function efficiently through dsRNA feeding, and the factors involved in the mechanism remain unknown. Herein, we identified three nucleases in the cotton boll weevil transcriptome denoted *AgraNuc1*, *AgraNuc2*, and *AgraNuc3*, and the influences of these nucleases on the gene silencing of *A. grandis* chitin synthase II (*AgraChSII*) were evaluated through oral dsRNA feeding trials. A phylogenetic analysis showed that all three nucleases share high similarity with the DNA/RNA non-specific endonuclease family of other insects. These nucleases were found to be mainly expressed in the posterior midgut region of the insect. Two days after nuclease RNAi-mediated gene silencing, dsRNA degradation by the gut juice was substantially reduced. Notably, after nucleases gene silencing, the orally delivered dsRNA against the *AgraChSII* gene resulted in improved gene silencing efficiency when compared to the control (non-silenced nucleases). The data presented here demonstrates that *A. grandis* midgut nucleases are effectively one of the main barriers to dsRNA delivery and emphasize the need to develop novel RNAi delivery strategies focusing on protecting the dsRNA from gut nucleases and enhancing its oral delivery and uptake to crop insect pests.

## OPEN ACCESS

**Citation:** Almeida Garcia R, Lima Pepino Macedo L, Cabral do Nascimento D, Gillet F-X, Moreira-Pinto CE, Faheem M, et al. (2017) Nucleases as a barrier to gene silencing in the cotton boll weevil, *Anthonomus grandis*. PLoS ONE 12(12): e0189600. <https://doi.org/10.1371/journal.pone.0189600>

**Editor:** Juan Luis Jurat-Fuentes, University of Tennessee, UNITED STATES

**Received:** July 19, 2017

**Accepted:** November 28, 2017

**Published:** December 20, 2017

**Copyright:** © 2017 Almeida Garcia et al. This is an open access article distributed under the terms of the [Creative Commons Attribution License](https://creativecommons.org/licenses/by/4.0/), which permits unrestricted use, distribution, and reproduction in any medium, provided the original author and source are credited.

**Data Availability Statement:** All relevant data are within the paper and its Supporting Information files.

**Funding:** This work was funded by CNPQ and CAPES.

**Competing interests:** The authors have declared that no competing interests exist.

## Introduction

The availability of different insect's transcriptomes allows the evaluation and identification of genes that can be potentially used for insect control using different biotechnological approaches [1–3]. To date, more than 100 insect transcriptomes have been deposited in

databases, such as InsectBase [4], allowing the assessment of important and essential insect genes [3, 5–8].

The cotton boll weevil (CBW), *Anthonomus grandis*, belongs to the coleopteran order and is considered one of the most damaging insect pests to cotton crops, responsible for huge damages in cotton yields in South America [3], particularly in Brazil. Adult females lay eggs inside cotton buds and squares, where the larvae break out and feed on the plant tissue [9, 10]. This CBW's endophytic habit substantially affects cotton buds flowering and thereby, the productivity, making its control difficult by using chemical pesticides. [11–13]. In optimal conditions, CBW takes approximately three weeks until reaching adulthood and each female can lay up to 300 eggs in cotton buds and squares, being able to generate 7 to 10 generations per year [3]. In normal conditions, the larva breaks out after three days of oviposition and immediately starts to feed. Approximately after 12 days, third instar larvae enter in pupa stage for five days and emerge as an adult. Adult CBW can live about 20 to 40 days, and its life cycle can last approximately 50 days [14].

In the past decade, Cry proteins from *Bacillus thuringiensis* (Bt) have been applied in the development of genetically modified (GM) cotton for CBW control [15–17]. An alternative approach for making GM cotton resistant to CBW is the application of RNA interference (RNAi) technology. RNAi is a promising alternative strategy for controlling crop insect pests that shows the advantage of using the insect's systemic gene-silencing machinery to suppress essential gene expression [18–21]. Double-stranded RNA (dsRNA) is the RNAi trigger molecule that primes the post-transcriptional downregulation of a target gene [22–24]. Studies using this technology showed efficient silencing of several target genes through microinjection into larvae and adult CBW insects [1, 25, 26], whereas experiments involving the dsRNA oral uptake resulted in ineffective gene knockdown [18].

Efficient RNAi-induced gene silencing in insects requires some essential factors, including dsRNA processing by RNAi enzymes [27], intracellular transport [28], expression of the core RNAi machinery [29], delivery method [30], and uptake from the hemolymph or gut [31]. Different studies showed that the RNAi efficacy varies among insect species [32–38]. Wang and colleagues (2016) [39] confirmed this phenomenon in a parallel study with four different insect species from different orders: *Locusta migratoria* (Orthoptera), *Periplaneta americana* (Blattaria), *Spodoptera lituria* (Lepidoptera) and *Zophobas atratus* (Coleoptera). They demonstrated that the hemolymph and midgut juice content are key factors for RNAi efficacy. Therefore, dsRNA exposure should persist long enough to allow cellular uptake.

The uptake of dsRNA can be achieved by soaking, microinjection or feeding, and the RNAi signal is subsequently transported between cells and tissues [40]. In CBW, the dsRNA microinjection methodology is known to work well [1, 25, 26], while oral feeding is not so effective [18], and soaking methodology has not been tested. The oral ingestion of dsRNA is associated with some barriers, such as the exposure of the dsRNA to nucleases secreted in the gut juice, the gut pH, the dsRNA concentration and dsRNA resistance [38, 41, 42]. Furthermore, the gut juice content is also stimulated by increasing the nucleic acid ingestion through the diet [41, 43]. The nuclease activity of some insects was previously detected in the saliva of *Culex pipiens quinquefasciatus* [44], *Glossina morsitans* [45], and *Nezara viridula* [46]. Nucleases have also been identified in the *Bombyx mori* gastric juice [47] and the *Schistocerca gregaria* gut [38]. All of the identified nucleases belong to an ancient DNA/RNA sugar non-specific endonuclease family that is conserved in both prokaryotes and eukaryotes [48]. This family of proteins degrades dsDNA and dsRNA in a sequence-independent manner [49, 50]. Intriguingly, these nucleases have been identified in insects that evolved in phylogenetically distant orders, suggesting a potential conservation of these enzymes across insect taxonomy [38]. However, the identification and characterization of gut nucleases in insects are poorly studied.

To understand why the oral delivery of dsRNA has not succeeded in CBW, the presence of gut nucleases was evaluated. *In silico* approaches coupled with transcriptomic analyses allowed the identification of transcript sequences that encode putative extracellular DNA/RNA non-specific nucleases. Molecular and biochemical methodologies indicated the involvement of potential extracellular DNA/RNA non-specific nucleases in the degradation of dsRNA in the CBW gut. The data presented here indicate that the nucleases present in the CBW gut could be a major barrier to RNAi gene silencing in this insect pest.

## Materials and methods

### Rearing of cotton boll weevil

Cotton boll weevils were reared under controlled conditions of temperature ( $26 \pm 2^\circ\text{C}$ ), relative humidity ( $70 \pm 10\%$ ) and light (12 h photoperiod). They were fed daily with an artificial diet. The adults were developmentally synchronized by transferring them to a different cage after outbreak [51].

### Identification and in silico analysis of CBW nucleases

An extracellular dsRNase found in *B. mori* (NM\_001098274.1) was used to identify orthologous proteins in the CBW transcriptome database [1] utilizing the tBLASTn tool (<https://blast.ncbi.nlm.nih.gov/Blast.cgi>). An open reading frame (ORF) cDNA search was performed using ORF Finder (<https://www.ncbi.nlm.nih.gov/orffinder/>). Nucleotide and peptide sequence alignments were executed with BioEdit (<http://www.mbio.ncsu.edu/bioedit/bioedit.html>) and the ClustalW algorithm (PAM250) [52]. Secondary structure prediction was performed on the GeneSilico protein structure Metaserver, which provides the mean secondary structure prediction from 16 different algorithms [53]. The signal peptide was predicted using the TargetP server [54]. Motifs were predicted with GLAM2 [55] using the 46 amino acid sequences. The phylogenetic analysis of the amino sequences from the nuclease catalytic domain was obtained using the phylogeny.fr server (one click mode) [56, 57]. The generated file was exported to the interactive Tree of Life (iTOL) software to view and format the constructed tree [58].

### RNA extraction and cDNA synthesis

Tissues of interest from CBW (anterior midgut, posterior midgut, posterior gut, whole gut and carcass) were dissected in 150 mM NaCl solution under an optical microscope and transferred to liquid nitrogen. RNA extraction from larvae and adult insects of CBW was performed with Trizol (Invitrogen), following the manufacturer's recommended protocol. Equal quantities of RNA (2  $\mu\text{g}$ ) were used for cDNA synthesis with the M-MLV reverse transcriptase (Invitrogen) according to the manufacturer's recommended protocol and 10 mM nvDT30 primer. The cDNA was stored at  $-20^\circ\text{C}$ .

### Synthesis of dsRNA

Template DNA flanked by the T7 promoter sequence was synthesized to produce the dsRNA of CBW nucleases (*AgraNuc1*, *AgraNuc2* and *AgraNuc3*) and *chitin synthase II*, as well as *gus* dsRNA [26]. PCR reactions for the amplification of adult CBW cDNA were performed with specific primers (10 mM) for each gene (Table 1), an annealing temperature of  $55^\circ\text{C}$ , 10X buffer, 50 mM  $\text{MgCl}_2$ , 10 mM dNTP and 1 U Taq polymerase (Invitrogen) following the manufacturer's recommended protocol. The amplified products were analyzed by agarose gel electrophoresis (1%), and the amplified fragments were purified with a QIAquick PCR purification kit (Qiagen) and ligated into the PCR2.1 vector following the manufacturer's

Table 1. Primer sequences.

| Primer            | Sequence (5' --> 3')                     |
|-------------------|------------------------------------------|
| AgraNuc1 Fw       | ATGTGACCACCGTAACCTGC                     |
| AgraNuc1 Rv       | GTCTGTAGGAGGATTTGGAC                     |
| AgraNuc2 Fw       | GACAATACGCTGCCAGAACTG                    |
| AgraNuc2 Rv       | TCTATCGAAGGTGAGCCAGG                     |
| AgraNuc3 Fw       | TTCTGAACGCGCTGCCTCAATG                   |
| AgraNuc3 Rv       | GATCTGATTGGCTGTCTTG                      |
| AgraChSII Fw      | AAGGCATTAACGGTGACGAC                     |
| AgraChSII Rv      | TCCAAGTCGTTGATGACTGC                     |
| nvDT30            | GAATTCACGCGTCGACTAGTAGCATATGTAC (T) 30VN |
| T7                | TAATACGACTCACTATAGGGAGA                  |
| T7M13 Rv          | TAATACGACTCACTATAGGGAGACAGGAAACAGCTATGAC |
| Agra-B-actin Fw   | GTAGCTCACGCCCTCGGTACT                    |
| Agra-B-actin Rv   | AGTGTGGCCGAGGTATGAC                      |
| Agra-β-tubulin Fw | AGATCGTCGAGGGTCTGATG                     |
| Agra-β-tubulin Rv | AAGGCGGGAATGACTTTACC                     |

<https://doi.org/10.1371/journal.pone.0189600.t001>

recommended protocol (ThermoFisher). The ligation product was transformed into *Escherichia coli* XL1-Blue. The recombinant plasmid DNA was extracted from positive white colonies, and a PCR reaction was performed as described above with primers T7 and T7M13 Rv (Table 1). The amplified products were purified with a QIAquick PCR purification (Qiagen) kit, and the purified products were used as a template for dsRNA synthesis using the MEGA-script RNAi kit (Ambion), following the manufacturer's recommended protocol. The dsRNAs length for AgraNuc1, AgraNuc2 and AgraNuc3 was, respectively, 291, 290 and 305 pb.

### Extraction of midgut juice and nuclease assay

The gut juice from the adult CBW anterior midgut was extracted. The insects were anesthetized on ice for 10 minutes and dissected to collect the gut. The contents of the gut were extracted by grinding and resuspended in 150 mM NaCl solution. The total protein concentration was quantified using the Bradford method [59]. The nuclease assay was performed by incubating 500 ng of dsRNA or dsDNA with the gut juice sample (1 µg) in Triple Buffer, as described by [60], with modifications (10 mM sodium acetate, 10 mM Mes and 20 mM Tris), pH 5.5 at 37°C for 30 minutes in a reaction volume of 20 µL. To analyze its integrity, the nuclease digestion product was visualized in an agarose gel (1%). The optimum pH for CBW gut juice nuclease activity was determined by incubating 1 µg of dsRNA (~200 bp) with 2 µg of gut juice in Triple Buffer (pH was adjusted with HCl or NaOH, from 3.0 to 9.0). The reaction was incubated for 30 minutes in a reaction volume of 70 µL at 37°C. Then, dsRNA was purified with equal volume of phenol chloroform and chloroform and centrifuged for 10 minutes. Supernatant was removed and dsRNA was precipitated with equal volume of isopropanol and centrifuged for 10 minutes. Pellet was washed with ethanol 70% and centrifuged for 5 minutes. Supernatant was discarded and the pellet was diluted in milliQ water. Absorbance was plotted in a graph and the products were analyzed by agarose gel electrophoresis (1%). One activity unit (AU) of Nuclease is defined as the amount of enzyme that causes a ΔA260 of 0.1 in 30 min. The absorbance was measured at 260 nm in the NanoVue Plus spectrophotometer (GE Healthcare). All the assays were performed in triplicate, using 3.3 µg gut juice protein.

## Microinjection of dsRNA into the CBW body cavity

CBW young adults were anesthetized on ice for 10 minutes. Subsequently, 500 ng of dsRNA against each nuclease was administered through a 10  $\mu$ L microinjection (syringe, Hamilton) into the insect body cavity, and these dsRNAs were injected both separately and in a mixture. The negative controls were microinjected with *gus* dsRNA. After the procedure, the insects were maintained under controlled conditions with respect to temperature ( $26 \pm 2^\circ\text{C}$ ), relative humidity ( $70 \pm 10\%$ ) and light (12-h photoperiod) for seven days.

## Analysis of nuclease expression patterns by quantitative real time-PCR

The relative gene expression of the nucleases in both CBW adults and larvae was validated by quantitative real-time PCR (RT-qPCR), and the relative expression levels were also measured in different sections of the gut (anterior midgut, posterior midgut and posterior gut), the whole gut and the carcass. Two and seven days after the microinjection, the insects were collected for gene silencing analysis. The RT-qPCR reactions were performed in a 7300 Real-Time PCR System (Applied Biosystems) using SYBR<sup>™</sup> Green as the intercalating fluorophore. Specific primers for the nucleases (Table 1) were used. Each reaction was performed with 2  $\mu$ L of diluted cDNA, 0.2  $\mu$ M of each nucleotide and 2.5  $\mu$ L of SYBR<sup>™</sup> Green in a total volume of 10  $\mu$ L.

The qRT-PCR program consisted of an initial step of  $95^\circ\text{C}$  for 10 minutes followed by 40 cycles of  $95^\circ\text{C}$  for 20 seconds,  $55^\circ\text{C}$  for 30 seconds and  $72^\circ\text{C}$  for 30 seconds. For the amplification analysis, the Ct value and amplification efficiency for each nucleotide (ranging from 90% to 100%) were determined using the Real-Time PCR Miner program (<http://www.miner.ewindup.info/>). The relative expression analysis based on the Ct values was performed with qBasePlus 2.0 using the Pfaffl method [61]. All qRT-PCR experiments included three biological replicates and three technical repetitions. The statistical analyses of the average nuclease expression levels were performed using Tukey's test with a 0.05% significance level for comparisons between treatments. *Agra- $\beta$ -actin* and *Agra- $\beta$ -tubulin* were used as reference genes.

## Collection of the midgut juice two days after silencing and dsRNA digestion

Two days after the dsRNA injection, the intestinal juices of CBW adults were collected and incubated with dsRNA as described previously. All treatments were incubated for 30 minutes at  $37^\circ\text{C}$  with the gut juice from a total of 10 insects.

## *Chitin synthase II* transcription after *AgraNuc* dsRNA administration through feeding two days after nuclease gene silencing, mortality and oviposition

Two days after the microinjection of nuclease dsRNA into the CBW body cavity and verification of gene silencing, the insects were starved for two days. After this starvation period, 500 ng of dsRNA against *chitin synthase II* (*AgraChSII*) was administered in 5% sucrose. Three days after the oral administration of dsRNA, the whole insects were collected to evaluate the level of *AgraChSII* gene silencing through RT-qPCR. All qRT-PCR experiments included three biological replicates and three technical repetitions. Insects were counted every 24 hours to assess mortality and eggs were counted to evaluate oviposition.

## Results

### In silico analysis of nucleases found in CBW transcriptome shows a conserved endonuclease G domain and secretion signal peptides

A tBLASTn analysis using a *B. mori* (NM\_001098274.1) nuclease sequence as a template revealed three CBW ortholog genes named *AgraNuc1* (GABY01017164.1), *AgraNuc2* (GABY01017702.1) and *AgraNuc3* (GABY01006596.1). The molecular weight of the encoded proteins were approximately 45–50 kDa. Amino acid conservation is particularly relevant for the catalytic domain of proteins belonging to the sugar non-specific nuclease family [48]. Indeed, the motif Hx<sub>22</sub>Nx<sub>4</sub>Qx<sub>5</sub>Nx<sub>8</sub>E, where “x” represents any amino acid, is characteristic to this nuclease family and specifies the key residues directly involved in metal binding and catalysis [48, 60, 62, 63] (Fig 1A). Moreover, motif prediction showed that all three nucleases have a high probability of carrying a putative secretory signal peptide (SP) (cutoff >90) (Fig 1A). Secondary structure prediction showed similarities between these nucleases and the sugar non-specific endonuclease G (Endo G) from *Drosophila melanogaster* [62] (Fig 1B). Furthermore, signal peptide prediction indicated that *AgraNuc1-3* has a high probability of containing a putative secretory signal peptide (SP) (cutoff >0.7).

The sugar non-specific endonuclease family comprises different groups of nucleases with different specialized physiological functions such as cell death and nutrition [38, 62]. To study the phylogenetic relationships between the *AgraNuc1-3* genes and those from the non-specific endonuclease family, a multiple alignment analysis was performed using the amino acid sequences of the core catalytic domain (approximately 50 amino acids) of 44 nucleases that belong to different species (Fig 1C). Motif prediction of all the nucleases selected in this study confirmed the occurrence of the key residues from the core catalytic domain in this nuclease family (S1 Fig). The nucleases could be further divided into two main groups (I and II) with 50% bootstrap values. The observation of paralogs in different insect species, such as *Dendroctonus ponderosae* or *D. melanogaster*, suggests the occurrence of several duplication events in the evolutionary history of this gene family. Group I includes orthologs of the EndoG and ExoG proteins that were functionally characterized in *D. melanogaster* [62], *Saccharomyces cerevisiae* [64], *Caenorhabditis elegans* [65] and *Homo sapiens* [66]. These enzymes are reported to participate in cell death-related mechanisms [62]. Group II comprises *AgraNuc1-3* and other insect nucleases that have already been characterized as having a nutrition function in *S. gregaria* [38] and *B. mori* [47]. Similar to the findings for *AgraNuc1-3*, these two previous studies identified a secretory peptide at the N-terminal section of the protein. Interestingly, a secretory peptide has been predicted for a large number of nucleases that only belong to group II. Altogether, these data highlight the fact that *AgraNuc1-3* nucleases belong to a group of sugar non-specific nucleases that might have nuclease activity specifically in an extracellular environment.

### The gut juice from CBW presents nuclease activity

In the attempt to identify the nuclease activity responsible for nucleic acid digestion in CBW, the gut juice was extracted from the insect anterior midgut (AMG) (S2 Fig). The ability of the CBW gut juice to digest different forms of nucleic acids was evaluated, and digestion was observed in a non-specific manner for both dsRNA and dsDNA (Fig 2A), which might demonstrate the presence of nucleases in the gut. Subsequently, the optimal pH for the gut juice nucleases was analyzed, and the results revealed that the nuclease activity is optimal in an acidic pH range from 5.5 to 6.5 (Fig 2B).

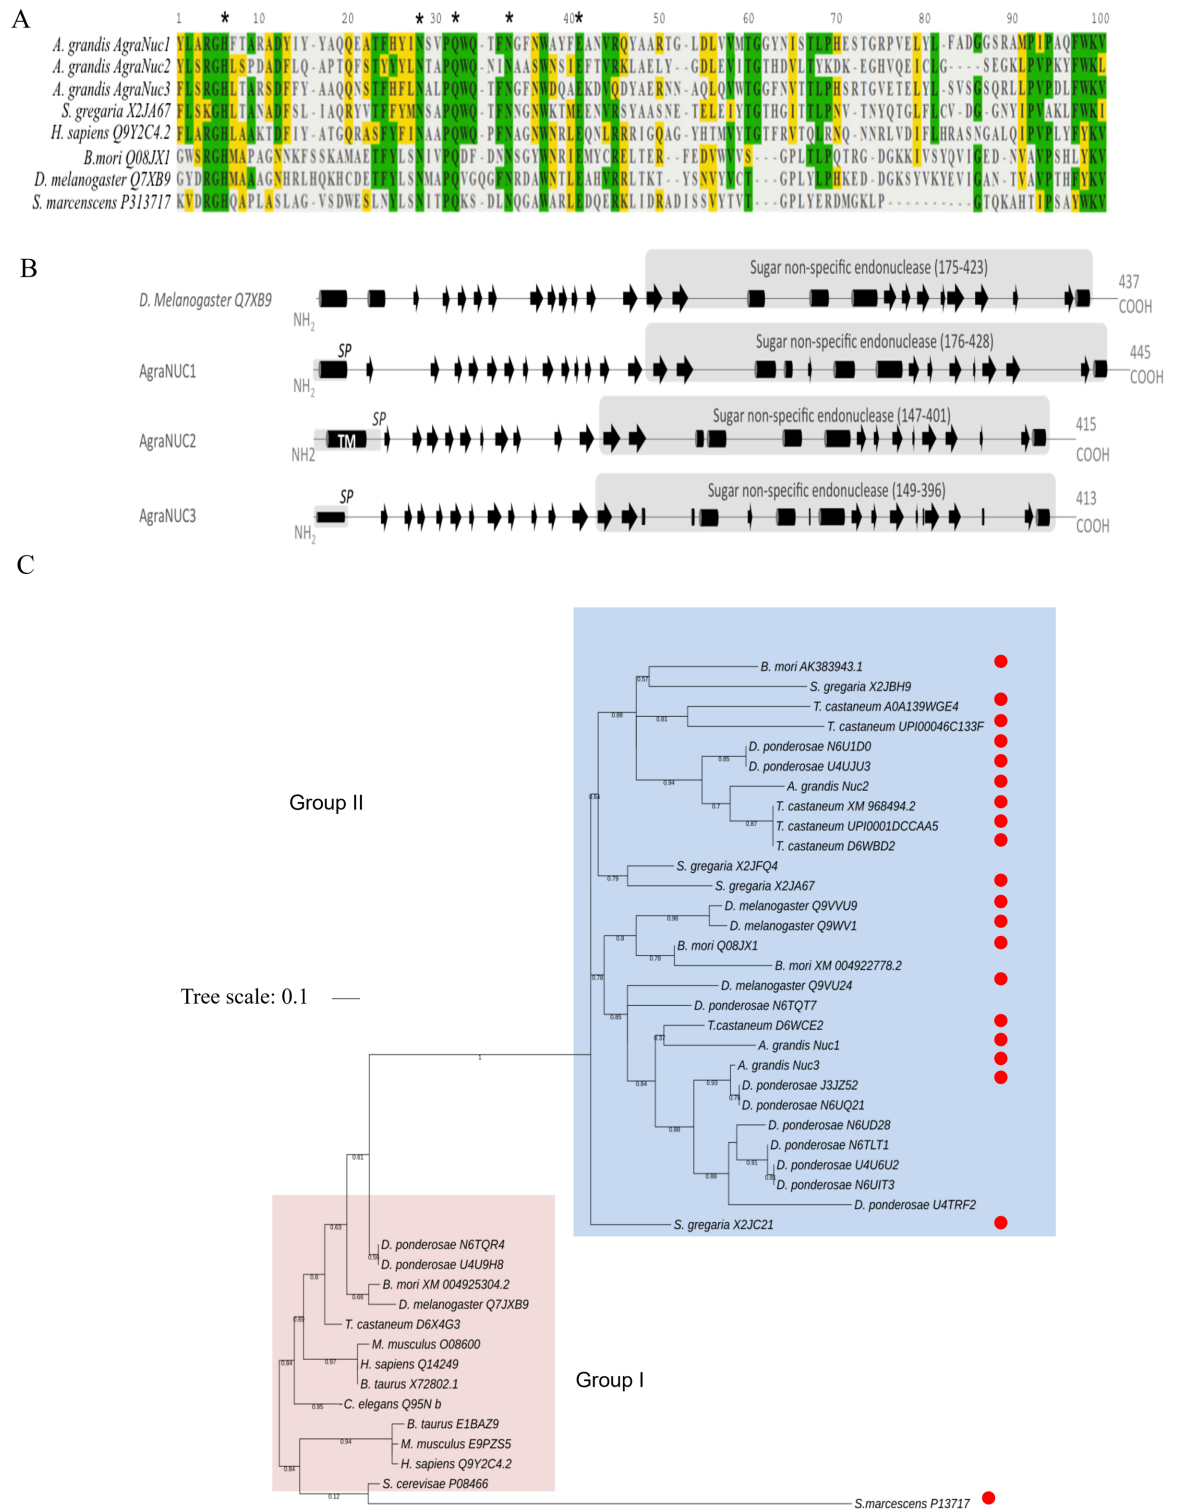

**Fig 1. In silico analysis of candidate nucleases identified within the CBW gut.** (A) Amino acid alignment of CBW nucleases with those from other insects and human sugar non-specific nucleases (*D. melanogaster*, *B. mori*, *S. gregaria*, *Mus musculus*, *B. taurus*, *H. sapiens*, and *S. cerevisiae*). The asterisks indicate the conserved motif HX<sub>22</sub>Nx<sub>4</sub>Qx<sub>5</sub>Nx<sub>8</sub>E, which is involved in metal binding and catalysis. Identical and similar amino acids are highlighted in green and yellow, respectively. (B) CBW nucleases showing a C-terminus DNA/RNA sugar non-specific endonuclease domain and an N-terminus signal peptide. The black arrows and black cylinders represent the predicted  $\beta$ -strand and  $\alpha$ -helix, respectively. "SP" is the predicted secretory peptide, and "TM" is a predicted transmembrane domain. The accession numbers refer to the UniProt protein data bank. (C)

Maximum-likelihood phylogenetic tree of the non-specific endonuclease family divided by different animal species. Groups I and II are included in the red and blue areas, respectively. The red disks indicate the prediction of a secretory peptide (>0.7) at the N-terminal section of the nucleases. The accession numbers correspond to the UniProt or NCBI databases.

<https://doi.org/10.1371/journal.pone.0189600.g001>

## *AgraNuc2* and *AgraNuc3* are highly expressed in the CBW posterior midgut

Digestive enzymes are first produced in gut cells and then secreted in the gut juice [67]. We compared the transcriptional expression profiles of the three above-mentioned CBW nucleases at different developmental stages of the insect, with a focus on the gut. In the first analysis, the carcass and gut from adults and larvae were dissected. The carcass corresponds to the whole insect body without the gut. *AgraNuc1* was found to express at a similar level in the carcass and the gut in both adults and larvae. In contrast, *AgraNuc2* and *AgraNuc3* showed higher expression levels in the gut than in the carcass. The relative expression of *AgraNuc2* and *AgraNuc3* in larvae was 400-600-fold higher than that in adults (Fig 3A and 3B). To examine the expression of *AgraNuc* genes in the gut, we conducted an additional transcriptional analysis of the *AgraNuc* genes, focusing on the anterior midgut (AMG), posterior midgut (PMG) and posterior gut (PG) (S2 Fig). As expected, *AgraNuc1* expression was lower in all gut compartments. However, the PMG displayed significantly higher expression of the *AgraNuc2* and *AgraNuc3* genes in adults (500- and 100-fold) and larvae (800- to 550-fold), respectively (Fig 3C and 3D).

## *AgraNuc* gene silencing resulted in decreased dsRNA digestion by the CBW gut juice

To determine whether the *AgraNuc* genes contribute to nucleic acid digestion in the gut juice, an RNAi assay of *AgraNuc* gene expression was performed. The downregulation of the *AgraNuc* genes was significant two days after the microinjection of dsRNA into the insect body cavity (Fig 4A) and persisted for seven days after the microinjection (S3 Fig). These results also showed that the microinjection of one specific dsRNA-*AgraNuc* can downregulate the gene expression of another nuclease. For example, dsRNA-*AgraNuc1* also downregulates the gene expression of *AgraNuc2* and *AgraNuc3*. The same phenomenon was found for *AgraNuc2*-dsRNA and *AgraNuc3*-dsRNA (Fig 4A). A dsRNA digestion assay was then performed with gut juice extracted from insects that were given a microinjection of dsRNA against nucleases and from uninjected insects. The gut juice from the uninjected insects resulted in the digestion of dsRNA (lane 3, Fig 4B), whereas the insects that received a microinjection of a mixture of dsRNA against the nucleases showed a decrease in dsRNA digestion (lane 4, Fig 4B). The treatment of insects with dsRNA that targeted *AgraNuc1* and *AgraNuc3* expression lead to dsRNA degradation by the gut juice, suggesting persistent nuclease activity after the dsRNA microinjection. However, a decrease in dsRNA degradation by the gut juice of insects treated with dsRNA-*AgraNuc2* was observed (S4 Fig). This outcome associates the gene silencing of *AgraNuc2*, but not that of *AgraNuc1* and *AgraNuc3*, with a loss of nuclease activity in the gut juice. Due *AgraNuc1* and *AgraNuc3* gene silencing had no effect on dsRNA digestion, it can be affirmed that the *AgraNuc2* knock down is necessary to avoid dsRNA degradation. Furthermore, gene silencing of the three *AgraNuc* genes led to a significant decrease in dsRNA degradation (Fig 4A).

## *AgraNucs* gene silencing improves RNAi efficiency through dsRNA feeding

Since, gene silencing of the three nucleases altogether resulted in decreased dsRNA digestion by the gut juice, dsRNA that targets *chitin synthase II* (*AgraChSII*) was orally administered to



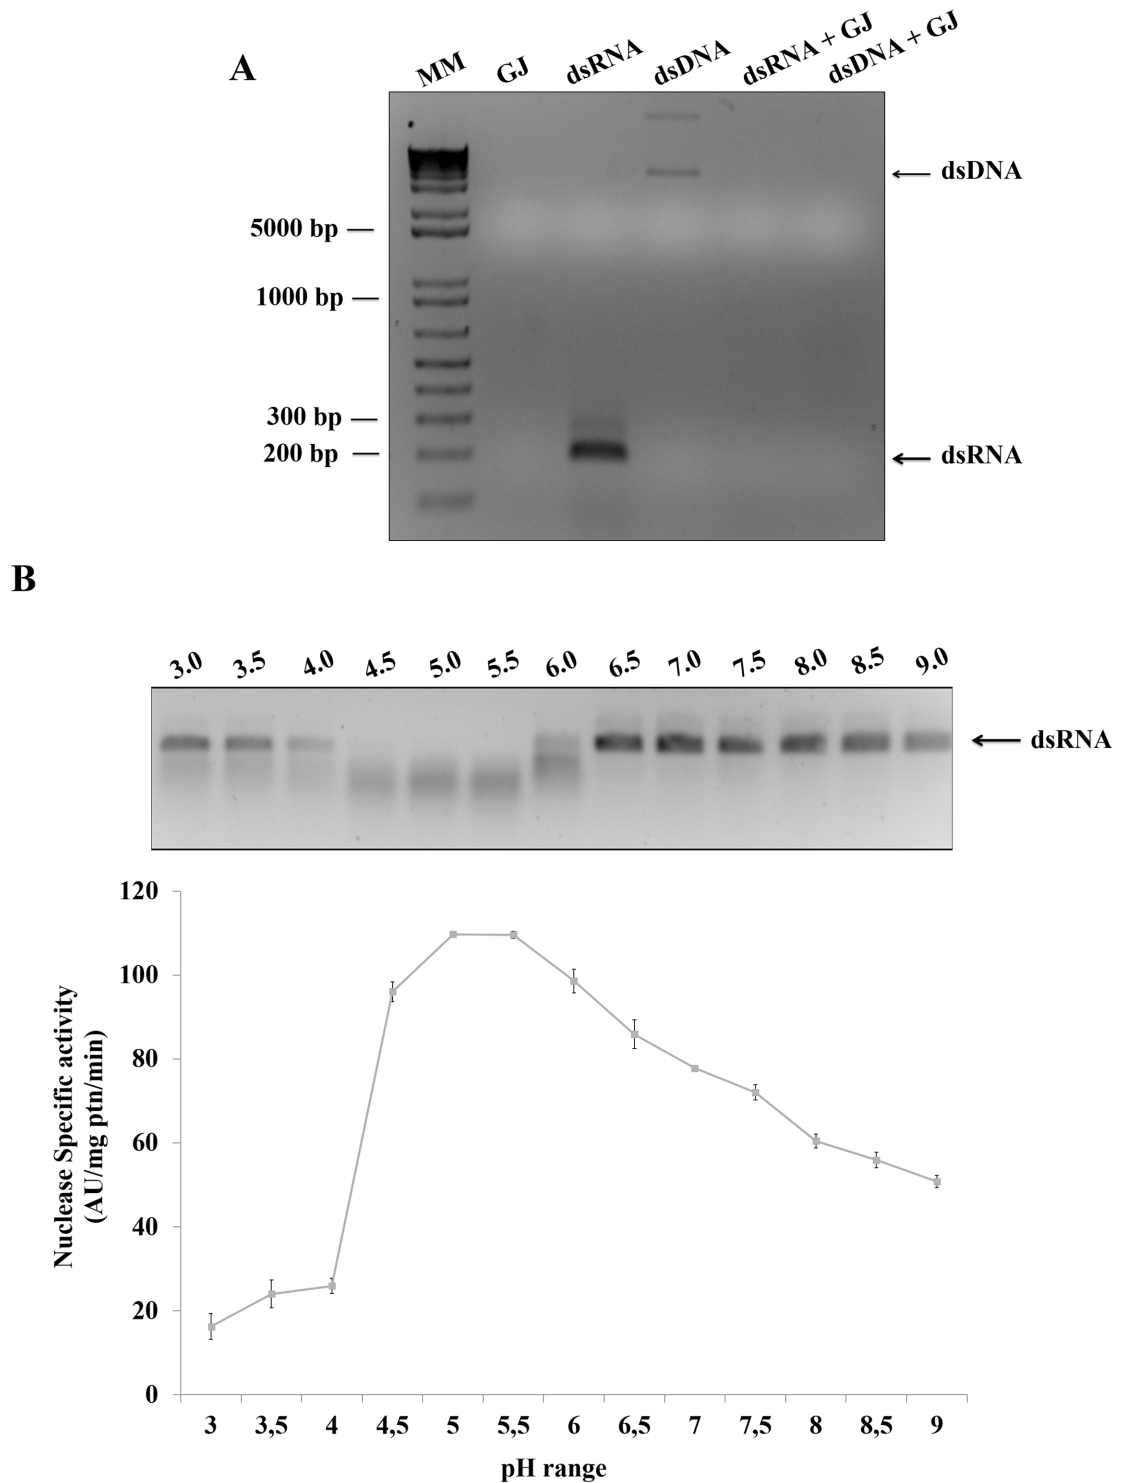

**Fig 2. Biochemical characterization of CBW gut juice.** (A) CBW gut juice (GJ), which is able to degrade both dsRNA, ~ 200bp, and dsDNA, > 5000 bp (as observed), has non-specific nuclease activity. MM: Molecular Marker 1-Kb Plus DNA ladder (Invitrogen); GJ: Gut Juice. Samples were incubated with GJ for 30 minutes at 37°C. (B) The optimal pH for nuclease activity ranges from 5.5 to 6.5, indicating that the nucleases function best at acidic pH.

<https://doi.org/10.1371/journal.pone.0189600.g002>

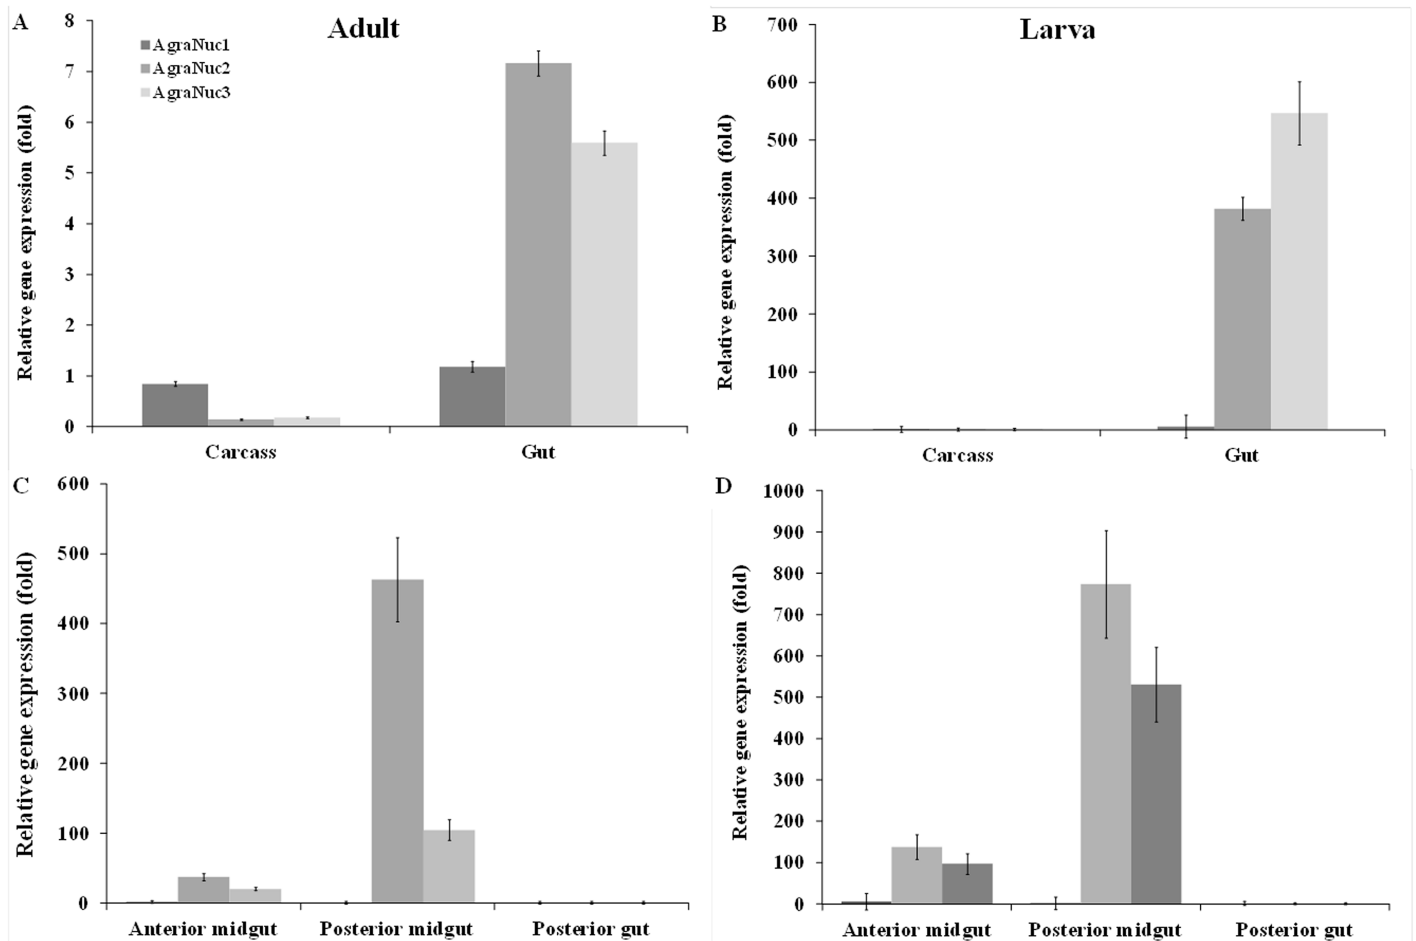

**Fig 3. RT-qPCR analysis of CBW nuclease expression at different developmental stages.** (A and B) CBW was dissected to obtain the gut and carcass, and nuclease expression was then measured in these samples. The bar chart shows that *AgraNuc1* expression is similar in the gut and carcass of the adult (A) and larvae (B), whereas *AgraNuc2* and *AgraNuc3* are highly expressed in the gut only. (C and D) The insect gut was sectioned into the anterior midgut (AMG), posterior midgut (PMG) and posterior gut (PG), and the expression levels of the nucleases in these sections were evaluated. Higher expression of *AgraNuc2* and *AgraNuc3* was observed in the PMG of both adults (C) and larvae (D), whereas *AgraNuc1* expression was similar in all gut sections. *Agra-β-actin* and *Agra-β-tubulin* were used as reference genes. The relative expression (UA) was calculated based on the lowest expression value that was obtained. Statistical analyses of the average transcripts expression levels were performed using Tukey's test with a 0.05% significance level for comparisons between treatments.

<https://doi.org/10.1371/journal.pone.0189600.g003>

CBW adult insects two days after the microinjection of *AgraNucs*-dsRNA and gene silencing verification. Chitin synthase II is responsible for the synthesis of chitin in the peritrophic membrane in the insect midgut [68–70]. The *AgraChSII* gene was silenced by a factor of approximately three after the oral administration of *AgraChSII*-dsRNA to insects in which *AgraNucs* was silenced (Fig 5). Also, insects were counted every 24 hours and mortality was of 85% in insects with nucleases and ChSII silenced, compared to 60% of insects with un-silenced nucleases and silenced ChSII. Control insects injected and fed with *gus* dsRNA had a mortality rate of 15% after 10 days. Oviposition decreased 50% in insects with nucleases and ChSII knock down, in contrast with oviposition of insects injected with *gus* dsRNA and fed with *ChSII* dsRNA. When compared to insects injected and fed with *gus* dsRNA, the oviposition of insects with nucleases and *AgraChSII* knock down was approximately 94% smaller, while the oviposition of insects injected with *gus* dsRNA and fed with *ChSII* dsRNA was approximately 80% smaller (data not shown).

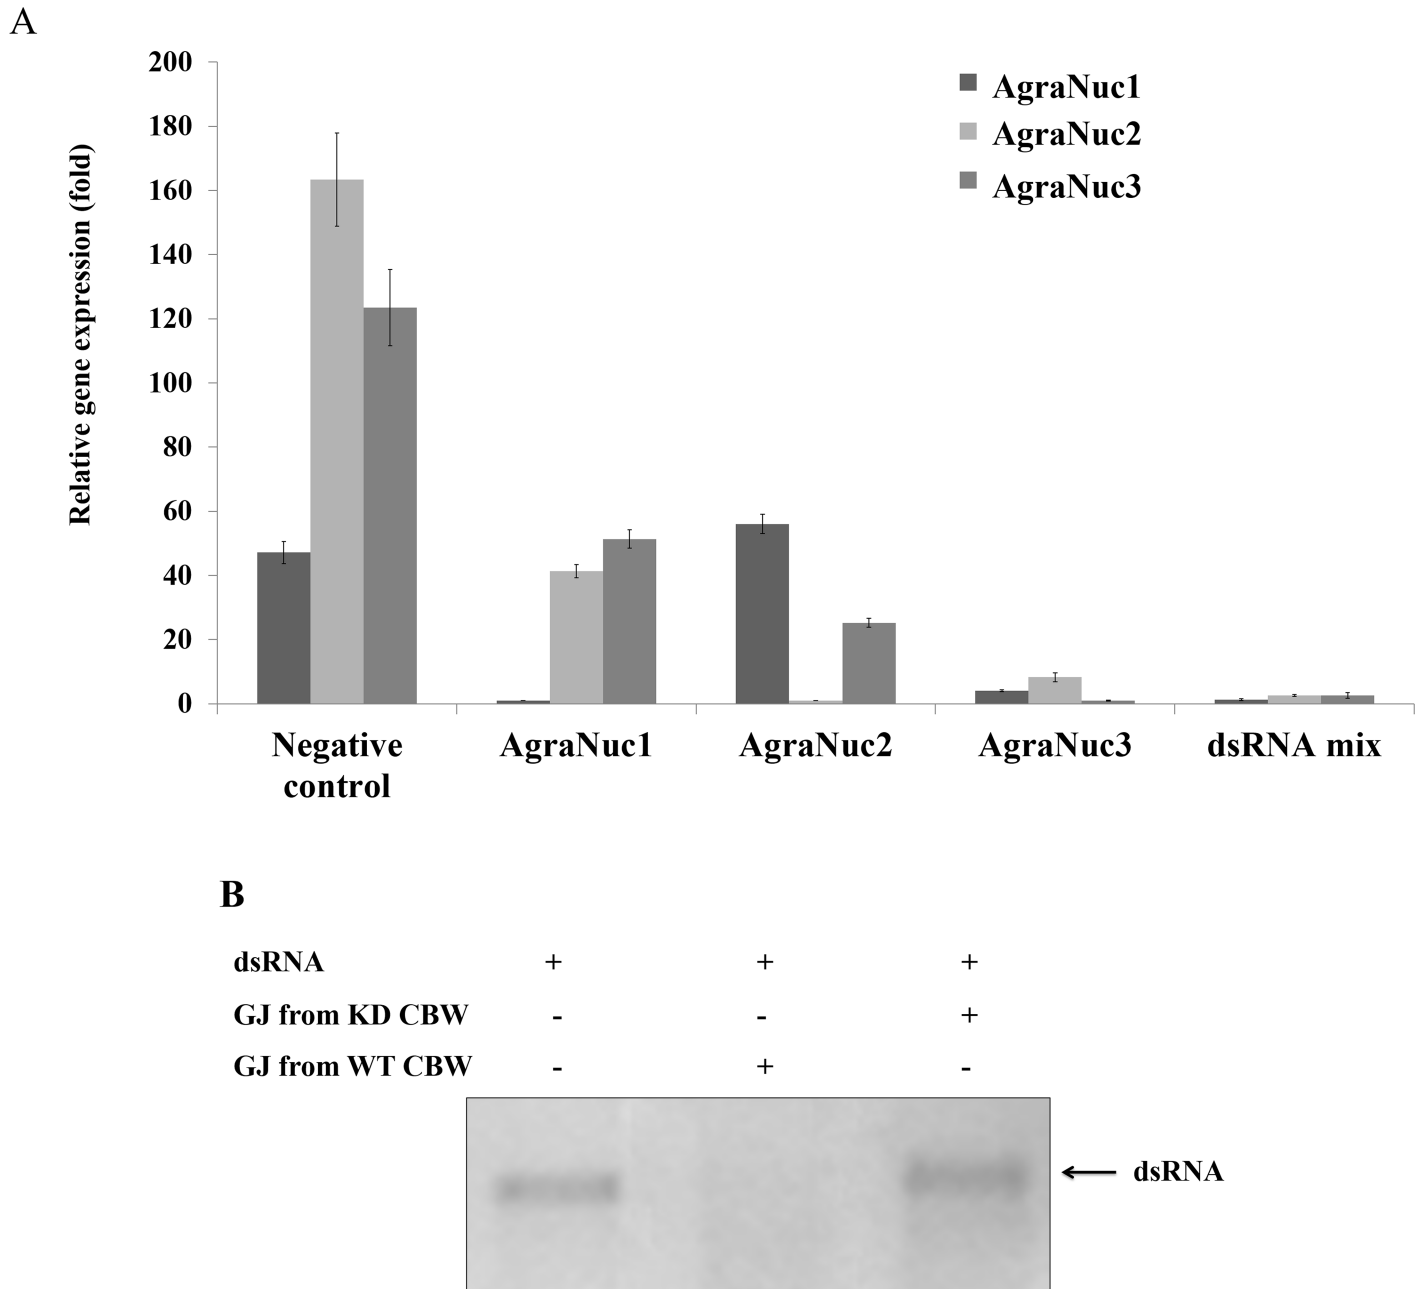

**Fig 4. Analysis of CBW nucleases two days after gene silencing by RT-qPCR and dsRNA digestion assay.** (A) Insect microinjection was performed with 500 ng of dsRNA against each nuclease and a mixture of all three dsRNAs (in a total of 1500 ng of dsRNA) and the analysis was performed two days after the microinjection. dsRNA against *gus* was used as a negative control, and *Agra-β-actin* and *Agra-β-tubulin* were used as reference genes. The relative expression (UA) was calculated based on the lowest expression value that was obtained. Statistical analyses of the average transcripts expression levels were performed using Tukey's test with a 0.05% significance level for comparisons between treatments. The bar chart shows that the expression of the nucleases, including each individual nuclease and all three nucleases together, was silenced. (B) dsRNA (~ 200 bp) was incubated with CBW gut juice (GJ) for 30 minutes at 37°C. GJ was collected two days after RNAi nuclease gene silencing, and 1% agarose gel electrophoresis was performed to analyze dsRNA digestion. GJ was collected from uninjected insects and from injected insects with all three nucleases silenced at once. GJ: Gut Juice, KD: knocked down, WT: wild type, CBW: cotton boll weevil.

<https://doi.org/10.1371/journal.pone.0189600.g004>

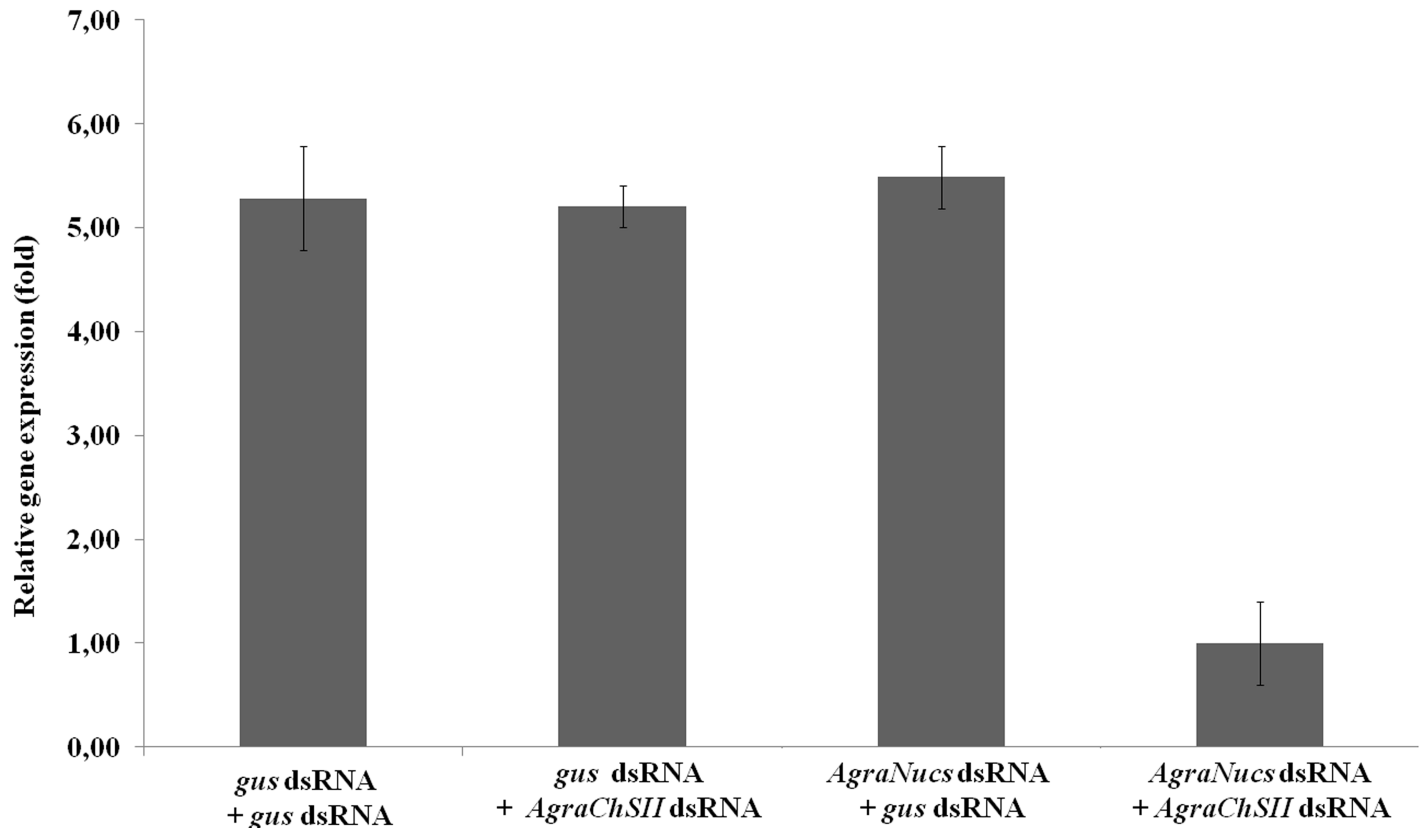

**Fig 5. Analysis of CBW *ChSII* gene expression after nuclease gene silencing.** Two days after microinjection of the nuclease dsRNA into the CBW body cavity, which silenced the *AgraNuc* genes, the insect was starved for two days, and 500 ng of *AgraChSII* dsRNA was orally administered. The insects with silenced nucleases (fourth bar) showed a decrease in *AgraChSII* transcript expression compared with the control insects (first, second and third bars). RNA extraction, cDNA synthesis and RT-qPCR were performed with the whole insect. dsRNA against *gus* was used as a negative control, and *Agra- $\beta$ -actin* and *Agra- $\beta$ -tubulin* were used as reference genes. The relative expression (UA) was calculated based on the lowest expression value that was obtained the average transcripts expression levels were performed using Tukey's test with a 0.05% significance level for comparisons between treatments.

<https://doi.org/10.1371/journal.pone.0189600.g005>

## Discussion

The main advantage of RNA interference technology in controlling crop insect pests is the high specificity for the target gene. Therefore, RNAi is an environmentally safe strategy that decreases off-target effects [19]. Transcriptome analysis can be performed to identify genes that are differentially expressed throughout the lifecycle processes of insects [71]. Using sequence information from the transcriptome, RNAi technology represents an advance in the genetic improvement of crops by conferring resistance to insect pests [72]. However, the delivery of dsRNA to the correct intracellular location and the interaction of dsRNA with the RNAi machinery of the target cell are important issues in the application of this technology. But certain barriers prevent the foreign invading RNA from interfering with the cellular system [73]. As RNA is negatively charged and has a high molecular weight, its movement into the cell is impeded by the lipid bilayer of the cell [74]. In insects, the virus-induced siRNA might saturate the cell to interfere with the artificially delivered dsRNA [75]. The interaction of dsRNA with the cellular receptor and its uptake by the cell also pose important barriers to dsRNA delivery. Nevertheless, the dsRNA concentration and length are critical for the effectiveness of the RNAi response because these features affect the cellular uptake of dsRNA [28, 76–78]. Among others, insect gut nucleases are one of the main barriers to the oral delivery of dsRNA in the

application of RNAi as a method for controlling crop insect pests. The oral delivery of dsRNA to its target is hampered by these nucleases because dsRNA catabolism can influence its efficiency. Understanding the interaction between the insects' nuclease activity and dsRNA is fundamental for the advancement of this biotechnological tool, which can be applied in various fields [27, 38, 41, 79–82].

Previous studies demonstrated that dsRNA administration through oral feeding is efficient for gene silencing in a variety of insect species, such as *Helicoverpa armigera* [20, 66, 83], *Diatraea virgifera* [18], *Aedes aegypti* [84], *Aphis gossypii* [85] and *Apis mellifera* [86]. However, this approach is not efficient in other insects, e.g., *S. gregaria* [38], *Acyrtosiphon pisum* [27], *Lygus lineolaris* [87] and *Locusta migratoria* [30]. Coelho and colleagues (2016) showed that the CBW shows a sensitive response to a dsRNA microinjection that interferes in gene silencing. In contrast, Baum and collaborators (2007) demonstrated that the same finding is not observed with the oral administration of dsRNA. This inefficiency is most likely due to gut enzymes that are capable of digesting the nutrients in cotton buds and squares, which are in starch [88] and nucleic acids [89]. It has not been demonstrated, but it can be suggested that CBW evolved to produce gut nucleases because of their feeding habit, being capable to degrade nucleic acids present in the tissues it feeds on. For RNAi technology to perform satisfactorily in crop fields, it is essential to have strategies that protect dsRNA molecules [32, 90–93] from the insect gut, as in CBW.

A study conducted by Shukla and colleagues (2016) [94] demonstrated the degradation of dsRNA in the gut lumen of *Heliothis virescens*. Herein, we report three different nucleases in the gut juice of CBW that are capable of degrading nucleic acid in the insect digestive system. Previously, we identified that the CBW anterior midgut has a pH value of 5.0, whereas the pH of the posterior midgut is 7.0 [26]. In this respect, the dsRNA used in this work was digested by gut nucleases at pH values ranging from 3.5 to 10.0, and at  $\text{pH} \geq 7.0$ , the dsRNA digestion was less intense. This data suggests that the nucleases are more active in the anterior midgut of the insect at acidic pH and inactive in the posterior sections with neutral pH. Different insects belonging to various coleopteran families, such as *Hypothenemus hampei* [95], *Dermestes maculatus* [96], *H. hampei* [97] and *Sitophilus zeamais* [98], the anterior midgut is acidic, with a pH ranging from 4.5 to 5.0 [99]. Therefore, the pH regulates the nature and activity of the digestive enzymes in the gut lumen [100]. The spatial organization of digestion must be related to the gut compartments; in other words, the action of certain enzymes must be associated with each insect gut lumen section, which present varying pH values [101].

The three nucleases (*AgraNuc1*, *AgraNuc2* and *AgraNuc3*) found in the CBW transcriptome [1] were identified based on the peptide sequence of the *B. mori* nuclease [47]. A phylogenetic analysis showed high similarity (>50%) among the CBW nucleases and other insect nucleases. These data, combined with the *in silico* analysis results, suggest that the *AgraNuc* genes encode DNA/RNA non-specific endonucleases and that *AgraNuc2* and *AgraNuc3* are more likely to be extracellular nucleases than *AgraNuc1*.

The results showed that *AgraNuc2* and *AgraNuc3* are expressed at higher levels in the gut (specifically, in the posterior midgut) in both adults and larvae. These results are in agreement with those reported by Wynant and coworkers (2014) [38], who used the same *B. mori* peptide sequence to identify nucleases in the *S. gregaria* transcriptome. In that study, nucleases were more expressed in the gut of *S. gregaria*. The transcription of *AgraNuc2* and *AgraNuc3* occurs mainly within the PMG, suggesting that these genes contribute to the digestive process. Additionally, this gene expression distribution in the gut supports the compartmentalization of the gut in terms of digestive function [101]. Insects with a peritrophic membrane show endo-ectoperitrophic circulation, which allows the absorption of nutrients that were previously degraded in the endoperitrophic space and enzyme recycling [101]. Hence, the digestive enzymes can be

synthesized, secreted in the saliva and posterior midgut, and then transported against the flow to the anterior gut and anterior midgut. This process explains why the transcript expression of the CBW nucleases investigated in this study is higher in the posterior midgut than in the anterior midgut while most of the activity occurs in the acidic anterior midgut. Nevertheless, *AgraNuc1* differs from its two orthologous genes, supporting the notion of a distinct function for this gene. Finally, in the present work, *AgraNuc1-3* was found to be probably more associated with nutrition than with cell death.

Nuclease gene silencing was detected two days after microinjection of the dsRNA into the CBW body cavity. Gene silencing by dsRNA against nucleases prevailed even seven days after the microinjection of a single dsRNA or a dsRNA mixture. Interestingly, an identity of a maximum of 11 nucleotides was observed among the nuclease sequences studied in this work. Although it is a short sequence match, it can be enough to cause gene silencing due to the seed region with short matches in the target site [102, 103]. Therefore, the gene silencing of one nuclease by RNAi can interfere with the expression of another nuclease gene by crossed gene silencing. These data suggest that the existence of an RNAi amplification pathway that is independent of RNA-dependent RNA polymerase (RdRp), a pathway that has not been detected in the CBW transcriptome [1]. This pathway is likely unknown but corroborates the findings reported by Wynant and colleagues (2014) [38], who observed the same pattern of crossed gene silencing of nuclease genes in *S. gregaria*.

The physiological effects of gene silencing were observed after the incubation of dsRNA with gut juice collected from CBWs that were microinjected with a mixture of dsRNA against the three nucleases. To obtain satisfactory physiological effects with RNAi, it is necessary to sufficiently reduce the expression level of the targeted nucleases and block dsRNA digestion. The physiological effects of nuclease gene silencing can be observed in this study. Silencing of the three CBW nucleases resulted in a reduction of targeted dsRNA digestion upon incubation with the gut juice, showing that the administration of multiple dsRNAs is not always ineffective. Regardless of the competition that might exist among the dsRNAs for the RNAi machinery, the results indicate that the system was not saturated [40, 77, 82]. In contrast, the silencing of the individual nucleases showed decreased dsRNA digestion only in the *AgraNuc2*-silenced insects. It was demonstrated that there was a cross-silencing phenomenon. dsRNA of each nuclease can silence all nucleases but this phenomenon was more intense when ds-*AgraNuc2* was administered. This may be indicative of a threshold of silencing which needs to be crossed, resulting in low levels of nucleases in gut juice in order to see a phenotype. This interesting phenomenon needs to be better studied in the future works. It is noteworthy that the sequences of the three nucleases did not present nucleotide identity higher than 20bp, suggesting the possibility that the decrease in the number of nucleases transcripts may be occurring due to higher levels of gene regulation for these nucleases genes. The data generated in this study corroborate the results reported by Wynant et al. (2014) [38], who identified nucleases that are capable of degrading dsRNA in the *S. gregaria* gut and were based on a *B. mori* dsRNase identified in the insect gut.

As observed in this study, the presence of nucleases in the gut of crop insect pests is an issue that needs to be addressed because RNAi can be utilized as an effective strategy for pest control. This study demonstrates that the nucleases present in the CBW midgut are capable of being silenced by RNAi, resulting in protection of dsRNA digestion by the gut juice. Thus, further studies are required to develop improved RNAi strategies that can effectively deliver dsRNA to insect pests with protection against insect nucleases, with applicability at field-level [92, 104, 105].

This work contributes to studies on the applicability of the RNAi technique for controlling crop insect pests. The presence of nucleases in the CBW gut leads to a decrease in dsRNA

effectiveness. The inhibition of dsRNA digestion improves its uptake by epithelial midgut cells, which is an effect that appears to be mediated by scavenger receptors [106, 107], and becomes significant with a dsRNA greater than 60 bp in length [28]. Digestion of dsRNA can be avoided by the development of approaches that bypass these digestion mechanisms, including the massive production of dsRNA inside chloroplasts [105, 108], dsRNA nanoencapsulation with chitosan [43, 92, 109], and cell-internalizing peptides [91] inside the plant cell. Together, these processes increase dsRNA half-life, enhancing its activity. This field is a novel and vast area associated with plant and crop insect pest biotechnology that requires further study. Thus, overcoming the current barriers to dsRNA delivery would be beneficial for the fruitful application of RNAi to crop fields with the aim of controlling endophytic crop insect pests, such as the cotton boll weevil.

## Supporting information

**S1 Fig. Conserved amino acids of nucleases.** The tree detailed in Fig 1C was constructed from the conserved regions (50 amino acids) of 44 nucleases. Through a Glam2 analysis [55], we verified whether these regions contain the conserved metal binding and catalytic core motifs, which are represented by the  $Hx_{22}Nx_4Qx_5Nx_8E$  motif and indicated by the black arrows.

(TIF)

**S2 Fig. Gut sections of CBW.** The CBW gut is morphologically divided into four sections: the anterior gut (AG), the anterior midgut (AMG), the posterior midgut (PMG) and the posterior gut (PG).

(TIF)

**S3 Fig. RT-qPCR analysis of CBW nucleases two and seven days after gene silencing.** Insect microinjection was performed with a mixture of nuclease dsRNAs, and the analysis was performed two and seven days after the microinjection. dsRNA against *gus* was used as a negative control, and *Agra-β-actin* and *Agra-β-tubulin* were used as reference genes. The relative expression (UA) was calculated based on the lowest expression value that was obtained. Statistical analyses of the average transcripts expression levels were performed using Tukey's test with a 0.05% significance level for comparisons between treatments.

(TIF)

**S4 Fig. dsRNA digestion assay with gut juice from insects with silenced *AgraNuc1*, *AgraNuc2* and *AgraNuc3*.** dsRNA (~200 bp) was incubated with CBW gut juice (GJ) that was collected 48 hours after the silencing of nuclease genes by RNAi, and 1% agarose gel electrophoresis was performed to analyze dsRNA digestion. NC: Negative Control; GJ: Gut Juice, KD: knocked down, CBW: cotton boll weevil.

(TIF)

## Author Contributions

**Conceptualization:** Rayssa Almeida Garcia, Leonardo Lima Pepino Macedo.

**Data curation:** Rayssa Almeida Garcia, Leonardo Lima Pepino Macedo, Danila Cabral do Nascimento, François-Xavier Gillet, Clidia Eduarda Moreira-Pinto.

**Formal analysis:** Rayssa Almeida Garcia.

**Funding acquisition:** Maria Cristina Mattar Silva, Maria Fatima Grossi-de-Sa.

**Investigation:** Rayssa Almeida Garcia.

**Methodology:** Rayssa Almeida Garcia.

**Supervision:** Leonardo Lima Pepino Macedo.

**Validation:** Rayssa Almeida Garcia.

**Visualization:** Rayssa Almeida Garcia.

**Writing – original draft:** Rayssa Almeida Garcia, François-Xavier Gillet.

**Writing – review & editing:** Rayssa Almeida Garcia, Leonardo Lima Pepino Macedo, Muhammad Faheem, Angelina Maria Moreschi Basso, Maria Cristina Mattar Silva, Maria Fatima Grossi-de-Sa.

## References

1. Firmino AA, Fonseca FC, de Macedo LL, Coelho RR, Antonino de Souza JD Jr., Togawa RC, et al. Transcriptome analysis in cotton boll weevil (*Anthonomus grandis*) and RNA interference in insect pests. *PLoS one*. 2013; 8(12):e85079. Epub 2014/01/05. <https://doi.org/10.1371/journal.pone.0085079> PMID: 24386449
2. Perera OP, Shelby KS, Popham HJ, Gould F, Adang MJ, Jurat-Fuentes JL. Generation of a Transcriptome in a Model Lepidopteran Pest, *Heliothis virescens*, Using Multiple Sequencing Strategies for Profiling Midgut Gene Expression. *PLoS one*. 2015; 10(6):e0128563. Epub 2015/06/06. <https://doi.org/10.1371/journal.pone.0128563> PMID: 26047101
3. Salvador R, Principi D, Berretta M, Fernandez P, Paniego N, Sciocco-Cap A, et al. Transcriptomic survey of the midgut of *Anthonomus grandis* (Coleoptera: Curculionidae). *J Insect Sci*. 2014; 14:219. Epub 2014/12/05. <https://doi.org/10.1093/jisesa/ieu081> PMID: 25473064.
4. Yin C, Shen G, Guo D, Wang S, Ma X, Xiao H, et al. InsectBase: a resource for insect genomes and transcriptomes. *Nucleic acids research*. 2016; 44(D1):D801–7. Epub 2015/11/19. <https://doi.org/10.1093/nar/gkv1204> PMID: 26578584
5. Fonseca FC, Firmino AA, de Macedo LL, Coelho RR, de Souza JD Junior, Silva OB Junior, et al. Sugarcane giant borer transcriptome analysis and identification of genes related to digestion. *PLoS one*. 2015; 10(2):e0118231. Epub 2015/02/24. <https://doi.org/10.1371/journal.pone.0118231> PMID: 25706301
6. Nakayama DG, Santos CD Junior, Kishi LT, Peduzzi R, Santiago AC, Soares-Costa A, et al. A transcriptomic survey of *Migdolus fryanus* (sugarcane rhizome borer) larvae. *PLoS one*. 2017; 12(3):e0173059. Epub 2017/03/02. <https://doi.org/10.1371/journal.pone.0173059> PMID: 28248990
7. Pauchet Y, Wilkinson P, van Munster M, Augustin S, Pauron D, ffrench-Constant RH. Pyrosequencing of the midgut transcriptome of the poplar leaf beetle *Chrysomela tremulae* reveals new gene families in Coleoptera. *Insect biochemistry and molecular biology*. 2009; 39(5–6):403–13. Epub 2009/04/15. <https://doi.org/10.1016/j.ibmb.2009.04.001> PMID: 19364528.
8. Pauchet Y, Wilkinson P, Vogel H, Nelson DR, Reynolds SE, Heckel DG, et al. Pyrosequencing the *Manduca sexta* larval midgut transcriptome: messages for digestion, detoxification and defence. *Insect molecular biology*. 2010; 19(1):61–75. Epub 2009/11/17. <https://doi.org/10.1111/j.1365-2583.2009.00936.x> PMID: 19909380.
9. Magalhaes DM, Borges M, Laumann RA, Woodcock CM, Pickett JA, Birkett MA, et al. Influence of Two Acyclic Homoterpenes (Tetranorterpenes) on the Foraging Behavior of *Anthonomus grandis* Boh. *Journal of chemical ecology*. 2016; 42(4):305–13. Epub 2016/04/24. <https://doi.org/10.1007/s10886-016-0691-1> PMID: 27105878.
10. Magalhaes DM, Borges M, Laumann RA, Sujii ER, Mayon P, Caulfield JC, et al. Semiochemicals from herbivory induced cotton plants enhance the foraging behavior of the cotton boll weevil, *Anthonomus grandis*. *Journal of chemical ecology*. 2012; 38(12):1528–38. Epub 2012/11/28. <https://doi.org/10.1007/s10886-012-0216-5> PMID: 23179097.
11. Neves RC, Colares F, Torres JB, Santos RL, Bastos CS. Rational Practices to Manage Boll Weevils Colonization and Population Growth on Family Farms in the Semiarido Region of Brazil. *Insects*. 2014; 5(4):818–31. Epub 2014/01/01. <https://doi.org/10.3390/insects5040818> PMID: 26462942
12. Oliveira GR, Silva MC, Lucena WA, Nakasu EY, Firmino AA, Beneventi MA, et al. Improving Cry8Ka toxin activity towards the cotton boll weevil (*Anthonomus grandis*). *BMC biotechnology*. 2011; 11:85. Epub 2011/09/13. <https://doi.org/10.1186/1472-6750-11-85> PMID: 21906288
13. Ribeiro PA, Sujii ER, Diniz IR, Medeiros MA, Salgado-Labouriau ML, Branco MC, et al. Alternative food sources and overwintering feeding behavior of the boll weevil, *Anthonomus grandis* bohemian



- (Coleoptera: Curculionidae) under the tropical conditions of Central Brazil. *Neotropical entomology*. 2010; 39(1):28–34. Epub 2010/03/23. PMID: 20305896.
14. Wanderley FSRPA. Ecology and Management of the Boll Weevil in South American Cotton. *American Entomologist*. 1996; 42(1):41–7. <https://doi.org/10.1093/ae/42.1.41>
  15. Oliveira RS, Oliveira-Neto OB, Moura HF, de Macedo LL, Arraes FB, Lucena WA, et al. Transgenic Cotton Plants Expressing Cry1Ia12 Toxin Confer Resistance to Fall Armyworm (*Spodoptera frugiperda*) and Cotton Boll Weevil (*Anthonomus grandis*). *Frontiers in plant science*. 2016; 7:165. Epub 2016/03/01. <https://doi.org/10.3389/fpls.2016.00165> PMID: 26925081
  16. Ribeiro TP, Arraes FB, Lourenco-Tessutti IT, Silva MS, Lisei-de-Sa ME, Lucena WA, et al. Transgenic cotton expressing Cry10Aa toxin confers high resistance to the cotton boll weevil. *Plant biotechnology journal*. 2017. Epub 2017/01/13. <https://doi.org/10.1111/pbi.12694> PMID: 28081289.
  17. Silva CR, Monnerat R, Lima LM, Martins ES, Melo Filho PA, Pinheiro MP, et al. Stable integration and expression of a *cry1Ia* gene conferring resistance to fall armyworm and boll weevil in cotton plants. *Pest management science*. 2016; 72(8):1549–57. Epub 2015/11/13. <https://doi.org/10.1002/ps.4184> PMID: 26558603.
  18. Baum JA, Bogaert T, Clinton W, Heck GR, Feldmann P, Ilagan O, et al. Control of coleopteran insect pests through RNA interference. *Nature biotechnology*. 2007; 25(11):1322–6. Epub 2007/11/06. <https://doi.org/10.1038/nbt1359> PMID: 17982443.
  19. Burand JP, Hunter WB. RNAi: future in insect management. *Journal of invertebrate pathology*. 2013; 112 Suppl:S68–74. Epub 2012/07/31. <https://doi.org/10.1016/j.jip.2012.07.012> PMID: 22841639.
  20. Mao YB, Cai WJ, Wang JW, Hong GJ, Tao XY, Wang LJ, et al. Silencing a cotton bollworm P450 monooxygenase gene by plant-mediated RNAi impairs larval tolerance of gossypol. *Nature biotechnology*. 2007; 25(11):1307–13. Epub 2007/11/06. <https://doi.org/10.1038/nbt1352> PMID: 17982444.
  21. Younis A, Siddique MI, Kim CK, Lim KB. RNA Interference (RNAi) Induced Gene Silencing: A Promising Approach of Hi-Tech Plant Breeding. *International journal of biological sciences*. 2014; 10(10):1150–8. Epub 2014/10/22. <https://doi.org/10.7150/ijbs.10452> PMID: 25332689
  22. Bossi L, Figueroa-Bossi N. Competing endogenous RNAs: a target-centric view of small RNA regulation in bacteria. *Nature reviews Microbiology*. 2016; 14(12):775–84. Epub 2016/11/01. <https://doi.org/10.1038/nrmicro.2016.129> PMID: 27640758.
  23. Elbashir SM, Harborth J, Lendeckel W, Yalcin A, Weber K, Tuschl T. Duplexes of 21-nucleotide RNAs mediate RNA interference in cultured mammalian cells. *Nature*. 2001; 411(6836):494–8. Epub 2001/05/25. <https://doi.org/10.1038/35078107> PMID: 11373684.
  24. Fire A, Xu S, Montgomery MK, Kostas SA, Driver SE, Mello CC. Potent and specific genetic interference by double-stranded RNA in *Caenorhabditis elegans*. *Nature*. 1998; 391(6669):806–11. Epub 1998/03/05. <https://doi.org/10.1038/35888> PMID: 9486653.
  25. Coelho RR, de Souza JD Junior, Firmino AA, de Macedo LL, Fonseca FC, Terra WR, et al. *Vitellin* knockdown strongly affects cotton boll weevil egg viability but not the number of eggs laid by females. *Meta gene*. 2016; 9:173–80. Epub 2016/07/16. <https://doi.org/10.1016/j.mgene.2016.06.005> PMID: 27419079
  26. Macedo LLP, Antonino de Souza JD Junior, Coelho RR, Fonseca FCA, Firmino AAP, Silva MCM, et al. Knocking down chitin synthase 2 by RNAi is lethal to the cotton boll weevil. *Biotechnology Research and Innovation*. 2017. <http://dx.doi.org/10.1016/j.biori.2017.04.001>.
  27. Christiaens O, Swevers L, Smaghe G. DsRNA degradation in the pea aphid (*Acyrtosiphon pisum*) associated with lack of response in RNAi feeding and injection assay. *Peptides*. 2014; 53:307–14. Epub 2014/01/08. <https://doi.org/10.1016/j.peptides.2013.12.014> PMID: 24394433.
  28. Bolognesi R, Ramaseshadri P, Anderson J, Bachman P, Clinton W, Flannagan R, et al. Characterizing the mechanism of action of double-stranded RNA activity against western corn rootworm (*Diabrotica virgifera virgifera* LeConte). *PloS one*. 2012; 7(10):e47534. Epub 2012/10/17. <https://doi.org/10.1371/journal.pone.0047534> PMID: 23071820
  29. Garbutt JS, Reynolds SE. Induction of RNA interference genes by double-stranded RNA; implications for susceptibility to RNA interference. *Insect biochemistry and molecular biology*. 2012; 42(9):621–8. Epub 2012/05/29. <https://doi.org/10.1016/j.ibmb.2012.05.001> PMID: 22634162.
  30. Luo Y, Wang X, Yu D, Chen B, Kang L. Differential responses of migratory locusts to systemic RNA interference via double-stranded RNA injection and feeding. *Insect molecular biology*. 2013; 22(5):574–83. Epub 2013/07/23. <https://doi.org/10.1111/imb.12046> PMID: 23869949.
  31. Swevers L, Liu J, Huvenne H, Smaghe G. Search for limiting factors in the RNAi pathway in silkworm tissues and the Bm5 cell line: the RNA-binding proteins R2D2 and Translin. *PloS one*. 2011; 6(5):e20250. Epub 2011/06/04. <https://doi.org/10.1371/journal.pone.0020250> PMID: 21637842

32. Garbutt JS, Belles X, Richards EH, Reynolds SE. Persistence of double-stranded RNA in insect hemolymph as a potential determiner of RNA interference success: evidence from *Manduca sexta* and *Blattella germanica*. *Journal of insect physiology*. 2013; 59(2):171–8. Epub 2012/06/06. <https://doi.org/10.1016/j.jinsphys.2012.05.013> PMID: 22664137.
33. Halim HMAE, Alshukri BM, Ahmad MS, Nakasu EY, Awwad MH, Salama EM, et al. RNAi-mediated knockdown of the voltage gated sodium ion channel TcNav causes mortality in *Tribolium castaneum*. *Scientific reports*. 2016; 6:29301. Epub 2016/07/15. <https://doi.org/10.1038/srep29301> PMID: 27411529
34. Huang JH, Lozano J, Belles X. Broad-complex functions in postembryonic development of the cockroach *Blattella germanica* shed new light on the evolution of insect metamorphosis. *Biochimica et biophysica acta*. 2013; 1830(1):2178–87. Epub 2012/10/09. <https://doi.org/10.1016/j.bbagen.2012.09.025> PMID: 23041750.
35. Lin YH, Huang JH, Liu Y, Belles X, Lee HJ. Oral delivery of dsRNA lipoplexes to German cockroach protects dsRNA from degradation and induces RNAi response. *Pest management science*. 2017; 73(5):960–6. Epub 2016/07/30. <https://doi.org/10.1002/ps.4407> PMID: 27470169.
36. Ren D, Cai Z, Song J, Wu Z, Zhou S. dsRNA uptake and persistence account for tissue-dependent susceptibility to RNA interference in the migratory locust, *Locusta migratoria*. *Insect molecular biology*. 2014; 23(2):175–84. Epub 2013/12/07. <https://doi.org/10.1111/imb.12074> PMID: 24308607.
37. Wang J, Wu M, Wang B, Han Z. Comparison of the RNA interference effects triggered by dsRNA and siRNA in *Tribolium castaneum*. *Pest management science*. 2013; 69(7):781–6. Epub 2013/03/26. <https://doi.org/10.1002/ps.3432> PMID: 23526733.
38. Wynant N, Santos D, Verdonck R, Spit J, Van Wielendaele P, Vanden Broeck J. Identification, functional characterization and phylogenetic analysis of double stranded RNA degrading enzymes present in the gut of the desert locust, *Schistocerca gregaria*. *Insect biochemistry and molecular biology*. 2014; 46:1–8. Epub 2014/01/15. <https://doi.org/10.1016/j.ibmb.2013.12.008> PMID: 24418314.
39. Wang K, Peng Y, Pu J, Fu W, Wang J, Han Z. Variation in RNAi efficacy among insect species is attributable to dsRNA degradation in vivo. *Insect biochemistry and molecular biology*. 2016; 77:1–9. Epub 2016/07/28. <https://doi.org/10.1016/j.ibmb.2016.07.007> PMID: 27449967.
40. Joga MR, Zotti MJ, Smaghe G, Christiaens O. RNAi Efficiency, Systemic Properties, and Novel Delivery Methods for Pest Insect Control: What We Know So Far. *Frontiers in physiology*. 2016; 7:553. Epub 2016/12/03. <https://doi.org/10.3389/fphys.2016.00553> PMID: 27909411
41. Katoch R, Thakur N. Insect Gut nucleases: a Challenge for RNA interference mediated insect control strategies. *Int J Biochem Biotechnol*. 2012; 1(8):198–203.
42. Price DR, Gatehouse JA. RNAi-mediated crop protection against insects. *Trends in biotechnology*. 2008; 26(7):393–400. Epub 2008/05/27. <https://doi.org/10.1016/j.tibtech.2008.04.004> PMID: 18501983.
43. Das S, Debnath N, Cui Y, Unrine J, Palli SR. Chitosan, Carbon Quantum Dot, and Silica Nanoparticle Mediated dsRNA Delivery for Gene Silencing in *Aedes aegypti*: A Comparative Analysis. *ACS applied materials & interfaces*. 2015; 7(35):19530–5. Epub 2015/08/21. <https://doi.org/10.1021/acsami.5b05232> PMID: 26291176.
44. Calvo E, Ribeiro JM. A novel secreted endonuclease from *Culex quinquefasciatus* salivary glands. *The Journal of experimental biology*. 2006; 209(Pt 14):2651–9. Epub 2006/07/01. <https://doi.org/10.1242/jeb.02267> PMID: 16809456.
45. Caljon G, De Ridder K, Stijlemans B, Coosemans M, Magez S, De Baetselier P, et al. Tsetse salivary gland proteins 1 and 2 are high affinity nucleic acid binding proteins with residual nuclease activity. *PLoS one*. 2012; 7(10):e47233. Epub 2012/10/31. <https://doi.org/10.1371/journal.pone.0047233> PMID: 23110062
46. Lomate PR, Bonning BC. Distinct properties of proteases and nucleases in the gut, salivary gland and saliva of southern green stink bug, *Nezara viridula*. *Scientific reports*. 2016; 6:27587. Epub 2016/06/11. <https://doi.org/10.1038/srep27587> PMID: 27282882
47. Arimatsu Y, Kotani E, Sugimura Y, Furusawa T. Molecular characterization of a cDNA encoding extracellular dsRNase and its expression in the silkworm, *Bombyx mori*. *Insect biochemistry and molecular biology*. 2007; 37(2):176–83. Epub 2007/01/25. <https://doi.org/10.1016/j.ibmb.2006.11.004> PMID: 17244546.
48. Rangarajan ES, Shankar V. Sugar non-specific endonucleases. *FEMS microbiology reviews*. 2001; 25(5):583–613. Epub 2001/12/18. PMID: 11742693.
49. Friedhoff P, Kolmes B, Gimadutdinov O, Wende W, Krause KL, Pingoud A. Analysis of the mechanism of the *Serratia* nuclease using site-directed mutagenesis. *Nucleic acids research*. 1996; 24(14):2632–9. Epub 1996/07/15. PMID: 8758988

50. Yang W. Nucleases: diversity of structure, function and mechanism. *Quarterly reviews of biophysics*. 2011; 44(1):1–93. Epub 2010/09/22. <https://doi.org/10.1017/S0033583510000181> PMID: 20854710.
51. Monnerat R, Dias S, Oliveira-NEto O, Nobre S, Silva-Werneck J, Grossi-de-Sa M. Criação massal do bicudo do algodoeiro *Anthonomus grandis* em laboratório. In: Cenargen E, editor. *Comunidade Técnico*, 46. Brasília2000.
52. Thompson JD, Higgins DG, Gibson TJ. CLUSTAL W: improving the sensitivity of progressive multiple sequence alignment through sequence weighting, position-specific gap penalties and weight matrix choice. *Nucleic acids research*. 1994; 22(22):4673–80. Epub 1994/11/11. PMID: 7984417
53. Kurowski MA, Bujnicki JM. GeneSilico protein structure prediction meta-server. *Nucleic acids research*. 2003; 31(13):3305–7. Epub 2003/06/26. PMID: 12824313
54. Emanuelsson O, Brunak S, von Heijne G, Nielsen H. Locating proteins in the cell using TargetP, SignalP and related tools. *Nature protocols*. 2007; 2(4):953–71. Epub 2007/04/21. <https://doi.org/10.1038/nprot.2007.131> PMID: 17446895.
55. Frith MC, Saunders NF, Kobe B, Bailey TL. Discovering sequence motifs with arbitrary insertions and deletions. *PLoS computational biology*. 2008; 4(4):e1000071. Epub 2008/04/26. <https://doi.org/10.1371/journal.pcbi.1000071> PMID: 18437229
56. Dereeper A, Audic S, Claverie JM, Blanc G. BLAST-EXPLORER helps you building datasets for phylogenetic analysis. *BMC evolutionary biology*. 2010; 10:8. Epub 2010/01/14. <https://doi.org/10.1186/1471-2148-10-8> PMID: 20067610
57. Dereeper A, Guignon V, Blanc G, Audic S, Buffet S, Chevenet F, et al. Phylogeny.fr: robust phylogenetic analysis for the non-specialist. *Nucleic acids research*. 2008; 36(Web Server issue):W465–9. Epub 2008/04/22. <https://doi.org/10.1093/nar/gkn180> PMID: 18424797
58. Letunic I, Bork P. Interactive Tree Of Life v2: online annotation and display of phylogenetic trees made easy. *Nucleic acids research*. 2011; 39(Web Server issue):W475–8. Epub 2011/04/08. <https://doi.org/10.1093/nar/gkr201> PMID: 21470960
59. Bradford MM. A rapid and sensitive method for the quantitation of microgram quantities of protein utilizing the principle of protein-dye binding. *Analytical biochemistry*. 1976; 72:248–54. Epub 1976/05/07. PMID: 942051.
60. Schafer P, Scholz SR, Gimadutdinov O, Cymerman IA, Bujnicki JM, Ruiz-Carrillo A, et al. Structural and functional characterization of mitochondrial EndoG, a sugar non-specific nuclease which plays an important role during apoptosis. *Journal of molecular biology*. 2004; 338(2):217–28. Epub 2004/04/07. <https://doi.org/10.1016/j.jmb.2004.02.069> PMID: 15066427.
61. Hellemans J, Mortier G, De Paepe A, Speleman F, Vandesompele J. qBase relative quantification framework and software for management and automated analysis of real-time quantitative PCR data. *Genome biology*. 2007; 8(2):R19. Epub 2007/02/13. <https://doi.org/10.1186/gb-2007-8-2-r19> PMID: 17291332
62. Loll B, Gebhardt M, Wahle E, Meinhart A. Crystal structure of the EndoG/EndoG1 complex: mechanism of EndoG inhibition. *Nucleic acids research*. 2009; 37(21):7312–20. Epub 2009/09/29. <https://doi.org/10.1093/nar/gkp770> PMID: 19783821
63. Wu SL, Li CC, Chen JC, Chen YJ, Lin CT, Ho TY, et al. Mutagenesis identifies the critical amino acid residues of human endonuclease G involved in catalysis, magnesium coordination, and substrate specificity. *Journal of biomedical science*. 2009; 16:6. Epub 2009/03/11. <https://doi.org/10.1186/1423-0127-16-6> PMID: 19272175
64. Buttner S, Eisenberg T, Carmona-Gutierrez D, Ruli D, Knauer H, Ruckstuhl C, et al. Endonuclease G regulates budding yeast life and death. *Molecular cell*. 2007; 25(2):233–46. Epub 2007/01/25. <https://doi.org/10.1016/j.molcel.2006.12.021> PMID: 17244531.
65. Lin JL, Wu CC, Yang WZ, Yuan HS. Crystal structure of endonuclease G in complex with DNA reveals how it nonspecifically degrades DNA as a homodimer. *Nucleic acids research*. 2016; 44(21):10480–90. Epub 2016/10/16. <https://doi.org/10.1093/nar/gkw931> PMID: 27738134
66. Cymerman IA, Chung I, Beckmann BM, Bujnicki JM, Meiss G. EXOG, a novel paralog of Endonuclease G in higher eukaryotes. *Nucleic acids research*. 2008; 36(4):1369–79. Epub 2008/01/12. <https://doi.org/10.1093/nar/gkm1169> PMID: 18187503
67. Douglas A. Alimentary canal, digestion and absorption. In: Simpson J, Douglas A, editors. *The Insects*. 5th ed. New York: Cambridge University Press; 2013.
68. Arakane Y, Specht CA, Kramer KJ, Muthukrishnan S, Beeman RW. Chitin synthases are required for survival, fecundity and egg hatch in the red flour beetle, *Tribolium castaneum*. *Insect biochemistry and molecular biology*. 2008; 38(10):959–62. Epub 2008/08/23. <https://doi.org/10.1016/j.ibmb.2008.07.006> PMID: 18718535.

69. Gagou ME, Kapsetaki M, Turberg A, Kafetzopoulos D. Stage-specific expression of the chitin synthase DmeChSA and DmeChSB genes during the onset of *Drosophila* metamorphosis. *Insect biochemistry and molecular biology*. 2002; 32(2):141–6. Epub 2002/01/05. PMID: [11755055](#).
70. Hogenkamp DG, Arakane Y, Zimoch L, Merzendorfer H, Kramer KJ, Beeman RW, et al. Chitin synthase genes in *Manduca sexta*: characterization of a gut-specific transcript and differential tissue expression of alternately spliced mRNAs during development. *Insect biochemistry and molecular biology*. 2005; 35(6):529–40. Epub 2005/04/29. <https://doi.org/10.1016/j.ibmb.2005.01.016> PMID: [15857759](#).
71. Liu Z, Wang X, Lei C, Zhu F. Sensory genes identification with head transcriptome of the migratory armyworm, *Mythimna separata*. *Scientific reports*. 2017; 7:46033. Epub 2017/04/08. <https://doi.org/10.1038/srep46033> PMID: [28387246](#)
72. Ali N, Datta SK, Datta K. RNA interference in designing transgenic crops. *GM crops*. 2010; 1(4):207–13. Epub 2011/08/17. <https://doi.org/10.4161/gmcr.1.4.13344> PMID: [21844675](#).
73. Oliveira S, Storm G, Schifflers RM. Targeted delivery of siRNA. *Journal of biomedicine & biotechnology*. 2006; 2006(4):63675. Epub 2006/10/24. <https://doi.org/10.1155/JBB/2006/63675> PMID: [17057365](#)
74. Dowdy SF. Overcoming cellular barriers for RNA therapeutics. *Nature biotechnology*. 2017; 35(3):222–9. Epub 2017/03/01. <https://doi.org/10.1038/nbt.3802> PMID: [28244992](#).
75. Kanasty RL, Whitehead KA, Vegas AJ, Anderson DG. Action and reaction: the biological response to siRNA and its delivery vehicles. *Molecular therapy: the journal of the American Society of Gene Therapy*. 2012; 20(3):513–24. Epub 2012/01/19. <https://doi.org/10.1038/mt.2011.294> PMID: [22252451](#)
76. Li W, Koutmou KS, Leahy DJ, Li M. Systemic RNA Interference Deficiency-1 (SID-1) Extracellular Domain Selectively Binds Long Double-stranded RNA and Is Required for RNA Transport by SID-1. *The Journal of biological chemistry*. 2015; 290(31):18904–13. Epub 2015/06/13. <https://doi.org/10.1074/jbc.M115.658864> PMID: [26067272](#)
77. Miller SC, Miyata K, Brown SJ, Tomoyasu Y. Dissecting systemic RNA interference in the red flour beetle *Tribolium castaneum*: parameters affecting the efficiency of RNAi. *PloS one*. 2012; 7(10):e47431. Epub 2012/11/08. <https://doi.org/10.1371/journal.pone.0047431> PMID: [23133513](#)
78. Ulvila J, Parikka M, Kleino A, Sormunen R, Ezekowitz RA, Kocks C, et al. Double-stranded RNA is internalized by scavenger receptor-mediated endocytosis in *Drosophila* S2 cells. *The Journal of biological chemistry*. 2006; 281(20):14370–5. Epub 2006/03/15. <https://doi.org/10.1074/jbc.M513868200> PMID: [16531407](#).
79. Katoch R, Sethi A, Thakur N, Murdock LL. RNAi for insect control: current perspective and future challenges. *Applied biochemistry and biotechnology*. 2013; 171(4):847–73. Epub 2013/08/02. <https://doi.org/10.1007/s12010-013-0399-4> PMID: [23904259](#).
80. Katoch R, Thakur N. RNA interference: a promising technique for the improvement of traditional crops. *International journal of food sciences and nutrition*. 2013; 64(2):248–59. Epub 2012/08/07. <https://doi.org/10.3109/09637486.2012.713918> PMID: [22861122](#).
81. Katoch R, Thakur N. Advances in RNA interference technology and its impact on nutritional improvement, disease and insect control in plants. *Applied biochemistry and biotechnology*. 2013; 169(5):1579–605. Epub 2013/01/17. <https://doi.org/10.1007/s12010-012-0046-5> PMID: [23322250](#).
82. Spit J, Philips A, Wynant N, Santos D, Plaetinck G, Vanden Broeck J. Knockdown of nuclease activity in the gut enhances RNAi efficiency in the Colorado potato beetle, *Leptinotarsa decemlineata*, but not in the desert locust, *Schistocerca gregaria*. *Insect biochemistry and molecular biology*. 2017; 81:103–16. Epub 2017/01/18. <https://doi.org/10.1016/j.ibmb.2017.01.004> PMID: [28093313](#).
83. Mao YB, Tao XY, Xue XY, Wang LJ, Chen XY. Cotton plants expressing CYP6AE14 double-stranded RNA show enhanced resistance to bollworms. *Transgenic research*. 2011; 20(3):665–73. Epub 2010/10/19. <https://doi.org/10.1007/s11248-010-9450-1> PMID: [20953975](#)
84. Singh AD, Wong S, Ryan CP, Whyard S. Oral delivery of double-stranded RNA in larvae of the yellow fever mosquito, *Aedes aegypti*: implications for pest mosquito control. *J Insect Sci*. 2013; 13:69. Epub 2013/11/15. <https://doi.org/10.1673/031.013.6901> PMID: [24224468](#)
85. Gong YH, Yu XR, Shang QL, Shi XY, Gao XW. Oral delivery mediated RNA interference of a carboxylesterase gene results in reduced resistance to organophosphorus insecticides in the cotton Aphid, *Aphis gossypii* Glover. *PloS one*. 2014; 9(8):e102823. Epub 2014/08/21. <https://doi.org/10.1371/journal.pone.0102823> PMID: [25140535](#)
86. Hunter W, Ellis J, Vanengelsdorp D, Hayes J, Westervelt D, Glick E, et al. Large-scale field application of RNAi technology reducing Israeli acute paralysis virus disease in honey bees (*Apis mellifera*, Hymenoptera: Apidae). *PLoS pathogens*. 2010; 6(12):e1001160. Epub 2011/01/05. <https://doi.org/10.1371/journal.ppat.1001160> PMID: [21203478](#)

87. Allen ML, Walker WB 3rd. Saliva of *Lygus lineolaris* digests double stranded ribonucleic acids. *Journal of insect physiology*. 2012; 58(3):391–6. Epub 2012/01/10. <https://doi.org/10.1016/j.jinsphys.2011.12.014> PMID: 22226823.
88. Oliveira-Neto OB, Batista JA, Rigden DJ, Franco OL, Falcao R, Fragoso RR, et al. Molecular cloning of alpha-amylases from cotton boll weevil, *Anthonomus grandis* and structural relations to plant inhibitors: an approach to insect resistance. *Journal of protein chemistry*. 2003; 22(1):77–87. Epub 2003/05/15. PMID: 12744224.
89. Ma J, Guo TL, Wang QL, Wang KB, Sun RR, Zhang BH. Expression profiles of miRNAs in *Gossypium raimondii*. *Journal of Zhejiang University Science B*. 2015; 16(4):296–303. Epub 2015/04/08. <https://doi.org/10.1631/jzus.B1400277> PMID: 25845363
90. Eguchi A, Dowdy SF. Efficient siRNA delivery by novel PTD-DRBD fusion proteins. *Cell Cycle*. 2010; 9(3):424–5. Epub 2010/01/22. <https://doi.org/10.4161/cc.9.3.10693> PMID: 20090414.
91. Eguchi A, Meade BR, Chang YC, Fredrickson CT, Willert K, Puri N, et al. Efficient siRNA delivery into primary cells by a peptide transduction domain-dsRNA binding domain fusion protein. *Nature biotechnology*. 2009; 27(6):567–71. Epub 2009/05/19. <https://doi.org/10.1038/nbt.1541> PMID: 19448630
92. Kumar DR, Saravana Kumar P, Gandhi MR, Al-Dhabi NA, Paulraj MG, Ignacimuthu S. Delivery of chitosan/dsRNA nanoparticles for silencing of *wing development vestigial (vg)* gene in *Aedes aegypti* mosquitoes. *International journal of biological macromolecules*. 2016; 86:89–95. Epub 2016/01/23. <https://doi.org/10.1016/j.ijbiomac.2016.01.030> PMID: 26794313.
93. Wang M, Jin H. Spray-Induced Gene Silencing: a Powerful Innovative Strategy for Crop Protection. *Trends in microbiology*. 2017; 25(1):4–6. Epub 2016/12/08. <https://doi.org/10.1016/j.tim.2016.11.011> PMID: 27923542
94. Shukla JN, Kalsi M, Sethi A, Narva KE, Fishilevich E, Singh S, et al. Reduced stability and intracellular transport of dsRNA contribute to poor RNAi response in lepidopteran insects. *RNA biology*. 2016; 13(7):656–69. Epub 2016/06/02. <https://doi.org/10.1080/15476286.2016.1191728> PMID: 27245473
95. Valencia A, Bustillo AE, Ossa GE, Chrispeels MJ. Alpha-amylases of the coffee berry borer (*Hypothenemus hampei*) and their inhibition by two plant amylase inhibitors. *Insect biochemistry and molecular biology*. 2000; 30(3):207–13. Epub 2000/03/25. PMID: 10732988.
96. Caldeira W, Dias AB, Terra WR, Ribeiro AF. Digestive enzyme compartmentalization and recycling and sites of absorption and secretion along the midgut of *Dermestes maculatus* (Coleoptera) larvae. *Archives of insect biochemistry and physiology*. 2007; 64(1):1–18. Epub 2006/12/15. <https://doi.org/10.1002/arch.20153> PMID: 17167750.
97. Rubio GJ, Bustillo PA, Vallejo EL, Acuna ZJ, Benavides MP. Alimentary canal and reproductive tract of *Hypothenemus hampei* (Ferrari) (Coleoptera: Curculionidae, Scolytinae). *Neotropical entomology*. 2008; 37(2):143–51. Epub 2008/05/29. PMID: 18506292.
98. Sousa G, Scudeler EL, Abrahão J, Conte H. Functional Morphology of the Crop and Proventriculus of *Sitophilus zeamais* (Coleoptera: Curculionidae). *Annals of the Entomological Society of America*. 2013; 106(6):846–52. <https://doi.org/10.1603/an13081>
99. Terra WR, Ferreira C. Insect digestive enzymes: properties, compartmentalization and function. *Comparative Biochemistry and Physiology Part B: Comparative Biochemistry*. 1994; 109(1):1–62. [http://dx.doi.org/10.1016/0305-0491\(94\)90141-4](http://dx.doi.org/10.1016/0305-0491(94)90141-4).
100. Gillot C. *Entomology*. 3rd ed. Dordrecht: Springer; 2005.
101. Terra WR. The origin and functions of the insect peritrophic membrane and peritrophic gel. *Archives of insect biochemistry and physiology*. 2001; 47(2):47–61. Epub 2001/05/29. <https://doi.org/10.1002/arch.1036> PMID: 11376452.
102. Kamola PJ, Nakano Y, Takahashi T, Wilson PA, Ui-Tei K. The siRNA Non-seed Region and Its Target Sequences Are Auxiliary Determinants of Off-Target Effects. *PLoS computational biology*. 2015; 11(12):e1004656. Epub 2015/12/15. <https://doi.org/10.1371/journal.pcbi.1004656> PMID: 26657993
103. Chen JS, Revilla AC, Guerrero M, Gumbayan AM, Zeller RW. Properties and kinetics of microRNA regulation through canonical seed sites. *Journal of RNAi and gene silencing: an international journal of RNA and gene targeting research*. 2015; 11:507–14. Epub 2015/04/15. PMID: 25870651
104. Gillet FX, Garcia RA, Macedo LLP, Albuquerque EVS, Silva MCM, Grossi-de-Sa MF. Investigating Engineered Ribonucleoprotein Particles to Improve Oral RNAi Delivery in Crop Insect Pests. *Frontiers in physiology*. 2017; 8:256. Epub 2017/05/16. <https://doi.org/10.3389/fphys.2017.00256> PMID: 28503153
105. Jin S, Singh ND, Li L, Zhang X, Daniell H. Engineered chloroplast dsRNA silences cytochrome p450 monooxygenase, V-ATPase and chitin synthase genes in the insect gut and disrupts *Helicoverpa armigera* larval development and pupation. *Plant biotechnology journal*. 2015; 13(3):435–46. Epub 2015/03/19. <https://doi.org/10.1111/pbi.12355> PMID: 25782349

106. Cappelle K, de Oliveira CF, Van Eynde B, Christiaens O, Smaghe G. The involvement of clathrin-mediated endocytosis and two Sid-1-like transmembrane proteins in double-stranded RNA uptake in the Colorado potato beetle midgut. *Insect molecular biology*. 2016; 25(3):315–23. Epub 2016/03/10. <https://doi.org/10.1111/imb.12222> PMID: 26959524.
107. Xiao D, Gao X, Xu J, Liang X, Li Q, Yao J, et al. Clathrin-dependent endocytosis plays a predominant role in cellular uptake of double-stranded RNA in the red flour beetle. *Insect biochemistry and molecular biology*. 2015; 60:68–77. Epub 2015/04/12. <https://doi.org/10.1016/j.ibmb.2015.03.009> PMID: 25863352.
108. Zhang J, Khan SA, Hasse C, Ruf S, Heckel DG, Bock R. Pest control. Full crop protection from an insect pest by expression of long double-stranded RNAs in plastids. *Science*. 2015; 347(6225):991–4. Epub 2015/02/28. <https://doi.org/10.1126/science.1261680> PMID: 25722411.
109. Xiao B, Ma P, Viennois E, Merlin D. Urocanic acid-modified chitosan nanoparticles can confer anti-inflammatory effect by delivering CD98 siRNA to macrophages. *Colloids and surfaces B, Biointerfaces*. 2016; 143:186–93. Epub 2016/03/25. <https://doi.org/10.1016/j.colsurfb.2016.03.035> PMID: 27011348
